# Supplementary material
Source: PubMed Central journal article supplement (PMC6464389)
Supplement: NIHMS1516128-supplement-Supplemental_Publication_Material.pdf [file NIHMS1516128-supplement-Supplemental_Publication_Material.pdf]

## SUPPLEMENTAL MATERIALS

**Reagents.** Human thrombin, rabbit IgG, goat IgG, PGE1, rabbit polyclonal anti-PDI antibodies, quercetin-3-rutinoside (rutin), and Duolink® In Situ Red Proximity Ligation Assay Kit Goat/Rabbit were purchased from Sigma (St. Louis, MO). D-Phe-Pro-Arg-chloromethyl ketone (PPACK) was obtained from EMD Millipore (Billerica, MA). Human vWF was from Haematologic Technologies (Essex Junction, VT). Botrocetin was kindly provided by Robert Andrews (Monash University, Australia).<sup>1</sup> Ristocetin was purchased from American Biochemical & Pharmaceuticals Ltd (Marlton, NJ). Cell-impermeable, biotin-containing probes that react with primary amines (sulfo-N-hydroxysulfosuccinimide-biotin, SSB) or free thiol (N<sup>α</sup>-(3-Maleimidylpropionyl) biocytin, MPB), Alexa Fluor 488-conjugated anti-His or anti-rat IgG antibodies, an Alexa Fluor 647-conjugated goat anti-mouse IgG1 antibody, mouse monoclonal anti-GPIIb $\alpha$  (clone: MM2/174 & SZ2) antibodies, lipofectamine 2000 transfection reagent, calcein-AM dye, and protein A/G agarose beads were from Thermo Scientific (Rockford, IL). Monoclonal blocking anti-PDI (clone: BD34), anti-human GPIIb $\alpha$  (clone: HIP1), anti-mouse P-selectin (clone: RB40.34) antibodies were obtained from BD Biosciences (San Jose, CA). Purified proteins of an ectodomain of human  $\alpha$ M $\beta$ 2 ( $\alpha$ M: Phe17-Asn1105 and  $\beta$ 2: Gln23-Asn700 expressed in CHO cells) and GPIIb $\alpha$  (His17-Leu505 expressed in CHO cells), goat IgG, polyclonal goat anti-PDI, goat anti-human  $\beta$ 2, and goat anti-PDI antibodies were from R&D Systems (Minneapolis, MN). GST-tagged full-length human GPIIb $\alpha$  (Met1-Leu652 with a truncation of Pro406-Ala431, expressed in Wheat germ) was purchased from Creative BioMart Inc. (Shirley, NY). Rabbit polyclonal anti-vWF and anti-GPIIb $\alpha$  antibodies were from Santa Cruz (Santa Cruz, CA). A rabbit polyclonal anti-PDI antibody was

obtained from Novus Biologicals (Littleton CO). Recombinant mouse TNF- $\alpha$ , an Alexa Fluor 647-conjugated antibody against mouse Ly-6G were purchased from BioLegend (San Diego, CA). FITC-conjugated rabbit polyclonal anti-vWF antibodies were obtained from Bioss antibodies (Woburn, MA). PE- or FITC-conjugated control IgGs or monoclonal antibodies against mouse P-selectin, activated  $\alpha$ IIb $\beta$ 3 integrin (clone: JON/A), or glycoprotein Iba (clone: Xia.B2), and a DyLight 488-conjugated rat antibody against mouse CD42c (GPIb $\beta$ ) were from Emfret Analytics (Eibelstadt, Germany). Tissue-Tek optimal cutting temperature compound was purchased from Thomas Scientific (Swedesboro, NJ). Vectashield Antifade mounting medium containing DAPI was obtained from Vector Laboratories (Burlingame, CA). A QuikChange Multi Site-Directed Mutagenesis kit was purchased from Agilent Technologies (Santa Clara, CA). 2-iodo-N-phenylacetamide (IPA) and  $^{13}\text{C}$ -IPA were obtained from Cambridge Isotopes. Eptifibatide (Integrilin) was from Schering Plough (Kenilworth, NJ). Control IgG and rabbit polyclonal anti-PDI antibodies were labeled with Alexa Fluor 488 (Invitrogen) in parallel according to the manufacturer's instructions. The molar ratio of Alexa Fluor to IgG or antibodies, determined spectrophotometrically, was 3.5.

**Isolation of platelets and neutrophils.** Mouse and human platelets were prepared as previously described.<sup>2</sup> Washed platelets were suspended in HEPES-Tyrode buffer (20 mM HEPES, pH 7.4, 136 mM NaCl, 2.7 mM KCl, 12 mM NaHCO<sub>3</sub>, 2 mM MgCl<sub>2</sub>, and 5.5 mM glucose) and adjusted to a density of  $3 \times 10^8$  cells/ml. Human blood and mouse bone marrow neutrophils were isolated as described previously.<sup>3</sup> The concentration of neutrophils was adjusted to  $1 \times 10^7$  cells/ml in RPMI1640 media. The present study was

approved by the Institutional Review Board of the University of Illinois at Chicago. All healthy donors provided written informed consent before inclusion in the study.

**Recombinant proteins.** Recombinant human wild-type PDI (wtPDI) and its activity-null mutant (dmPDI in which two CysGlyHisCys sequences are mutated to SGHS) in a pET-15b vector carrying an N-terminal His tag (Novagen) were expressed in Clearcoil BL21 (DE3, Lucigen) to eliminate endotoxin.<sup>4</sup> The constructs of four different PDI domains (a, b, b', and a') were kindly provided from Robert Flaumenhaft (Beth Israel Deaconess Medical Center, Boston, MA) and expressed in the same manner. All proteins were purified using Ni<sup>2+</sup>-affinity chromatography.

**Purification of Anfibatide.** Anfibatide, a specific antagonist of GPIIb/IIIa, was purified from the snake venom of *Agkistrodon acutus* using ion exchange and gel filtration chromatography as described previously.<sup>5</sup> Purified Anfibatide was a heterodimeric protein of 29 kDa that is composed of  $\alpha$  (15-kDa) and  $\beta$  (14-kDa) subunits as analyzed by SDS-PAGE electrophoresis.<sup>5</sup>

**Platelet agglutination and aggregation assay.** Washed mouse and human platelets in HEPES-Tyrode buffer (20 mM HEPES, pH 7.4, 136 mM NaCl, 2.7 mM KCl, 12 mM NaHCO<sub>3</sub>, 2 mM MgCl<sub>2</sub>, and 5.5 mM glucose) were incubated with 10  $\mu$ g/ml vWF and 10  $\mu$ g/ml botrocetin, and 5  $\mu$ g/ml vWF and 0.3 mg/ml ristocetin, respectively. Platelets were pretreated with 10  $\mu$ g/ml mouse IgG1 or a blocking anti-PDI antibody (BD34), and/or with 0.2  $\mu$ g/ml BSA or Anfibatide for 30 minutes at 37°C. In some experiments, PDI-null

platelets were pretreated with 50 µg/ml wtPDI or dmPDI for 30 minutes at 37°C. In another experiment, platelets were pretreated with or without 10 µg/ml eptifibatide, different concentrations of Anfibatide, or 50 µM rutin, followed by incubation with vWF and either botrocetin or ristocetin. For aggregation assays, WT or hIL4R/GPIbα platelets in HEPES-Tyrode buffer were pretreated with or without 10 µg/ml eptifibatide and then stimulated with 0.025 U/ml thrombin. Platelet agglutination and aggregation were measured in a 4-channel platelet lumi-aggregometer (Chronolog Corp, Havertown, PA) at 37°C with stirring at 1,000 rpm.

**Flow cytometry.** Human or mouse platelets were treated with different doses (0.01, 0.025, 0.05 U/ml) of thrombin for 5 minutes at 37°C, followed by incubation with 50 µM PPACK. Cells were then incubated with PE- or Alexa Fluor 488-conjugated control IgG or antibodies against P-selectin, PDI or activated αIIbβ3 integrin. In some experiments, platelets were incubated with rat isotype control IgG or anti-GPIbα antibodies and then with Alexa Fluor 488 anti-rat IgG. Cells were analyzed by flow cytometric analysis (Cyan ADP, Beckman Coulter).

**vWF binding assay.** Mouse platelets were incubated with 10 µg/ml vWF in the presence or absence of 10 µg/ml botrocetin. To prevent the metalloprotease-mediated shedding of GPIbα and binding of vWF to αIIbβ3 integrin and P-selectin,<sup>6-9</sup> platelets were incubated with 10 mM EDTA prior to botrocetin stimulation. In some experiments, WT and PDI-null platelets were pretreated with 50 µg/ml wtPDI or dmPDI. In other experiments, mouse platelets were pretreated with vehicle or 10 µg/ml eptifibatide, 10 µg/ml control IgG, a

blocking anti-PDI antibody (BD34), or an anti-P-selectin antibody (RB40.34), and/or 0.2  $\mu\text{g/ml}$  BSA or Anfibatide for 30 minutes at 37°C. After washing with HEPES-Tyrode buffer, platelets were incubated with 10  $\mu\text{g/ml}$  vWF in the presence or absence of 10  $\mu\text{g/ml}$  botrocetin for 10 minutes. In another experiment, WT or hIL4R/GPIb $\alpha$  platelets were used. Cells were then fixed with 1% paraformaldehyde, centrifuged at 800g for 2 minutes and resuspended in HEPES-Tyrode buffer. Cells were incubated with FITC-conjugated control IgG or rabbit anti-vWF antibodies for 30 minutes. Cells were analyzed by flow cytometric analysis (Cyan ADP, Beckman Coulter).

**$\alpha\text{M}\beta\text{2}$  binding assay.** Mouse or human platelets were pretreated with vehicle or 10  $\mu\text{g/ml}$  eptifibatide, 10  $\mu\text{g/ml}$  control IgG, a blocking anti-PDI antibody (BD34), or an anti-P-selectin antibody (RB40.34), and/or 0.2  $\mu\text{g/ml}$  BSA or Anfibatide for 30 minutes at 37°C. After washing with HEPES-Tyrode buffer, platelets were incubated with recombinant human  $\alpha\text{M}\beta\text{2}$ , 10  $\mu\text{g/ml}$ , in the presence or absence of 0.5 mM  $\text{MnCl}_2$  for 30 minutes at 37°C. In some experiments, WT or PDI-null platelets were pretreated with or without 50  $\mu\text{g/ml}$  wtPDI or dmPDI and then incubated with 10  $\mu\text{g/ml}$  recombinant human  $\alpha\text{M}\beta\text{2}$  in the presence or absence of 0.5 mM  $\text{MnCl}_2$  for 30 minutes at 37°C. In another experiment, hIL4R/GPIb $\alpha$  platelets were incubated with  $\alpha\text{M}\beta\text{2}$  in the presence or absence of 0.5 mM  $\text{MnCl}_2$  and 50  $\mu\text{g/ml}$  wtPDI for 30 minutes at 37°C. After washing out unbound  $\alpha\text{M}\beta\text{2}$ , platelets were incubated with 5  $\mu\text{g/ml}$  FITC-conjugated control IgG or goat anti-human  $\beta\text{2}$  antibodies, followed by flow cytometric analysis.

**Surface plasmon resonance.** The interaction of platelet surface PDI with GPIb $\alpha$  was

investigated by using surface plasmon resonance with Biacore T200. The extracellular domain of recombinant GPIIb $\alpha$  (0.5 mg/ml in 10 mM sodium acetate buffer, pH 4.0) was immobilized onto a CM5 chip (Series S, Sensor Chip CM5, GE Healthcare) according to the manufacturer's instructions. Various concentrations of wtPDI or dmPDI (0.26 to 18  $\mu$ M) or soluble  $\alpha$ M $\beta$ 2 (0.03 to 21  $\mu$ M) in running buffer (10 mM HEPES, pH 7.5 including 150 mM NaCl, 0.05% Tween-20, 1 mM MgCl<sub>2</sub>, 0.5 mM MnCl<sub>2</sub>, and 1 mM dithiothreitol) were infused over the reference and integrin-immobilized surfaces at a flow rate of 15  $\mu$ l/minute for 180 seconds, followed by a dissociation phase of 120 seconds. Specific binding between two proteins was calculated by subtracting the reference sensorgram from the sample. Data were analyzed with a software (Biacore T200 version 1.0, GE Healthcare).

**Immunoprecipitation.** Mouse platelets, 500  $\mu$ l of  $6 \times 10^8$  cells/ml, were stimulated with or without thrombin (0.025 U/ml) for 5 minutes at 37°C. The reaction was quenched with 50  $\mu$ M PPACK. Platelets were then incubated with 100  $\mu$ M SSB for 20 minutes at 37°C and then with 20 mM Tris-HCl, pH 7.4, to quench the reaction. After washing three times, platelets were lysed with ice-cold lysis buffer (20 mM TBS, pH 7.4, containing 1% Triton X-100, 0.1% SDS, 2 mM EDTA, 2 mM Na<sub>3</sub>VO<sub>4</sub>, protease inhibitor cocktail, and 2 mM phenylmethylsulfonyl fluoride), followed by incubation with control IgG or anti-PDI antibodies for 1 hour at room temperature and then with protein A/G beads for overnight at 4°C. The bound fractions were immunoblotted with indicated antibodies. The blots were stripped and re-probed with peroxidase-conjugated avidin. The band density was measured by densitometry using Scion Image (v4.0).

**PDI binding assay.** Platelets isolated from WT and hIL4R/GPIb $\alpha$  Tg mice were pretreated with 50  $\mu$ g/ml His-tagged wtPDI or dmPDI for 30 minutes at 37°C. Platelets were then stimulated with or without 0.025 U/ml thrombin for 5 minutes at 37°C. The reaction was quenched with 50  $\mu$ M PPACK. Cells were then incubated with Alexa Fluor 488-conjugated anti-His antibodies, followed by flow cytometric analysis.

**ELISA.** Recombinant GST-tagged GPIb $\alpha$ , 1  $\mu$ g/ml, was immobilized on a well of a 96 well plate. After blocking with 1% BSA, different concentrations of wt and dmPDI, and its domain fragments (1 nM to 10  $\mu$ M) in 20 mM HEPES buffer, pH 7.4, containing 1 mM glutathione were added to the well and incubated for 1 hour at room temperature. Then, anti-His antibodies, 1  $\mu$ g/ml, were incubated for 1 hour at room temperature, followed by incubation with HRP-conjugated anti-mouse IgG antibodies. After the addition of 3,3',5,5'-tetramethylbenzidine (Pierce), the reaction was stopped with 1 N HCl. The signal was measured at 450 nm using a microplate reader (PHERAstar, BMG Labtec, Germany). Values obtained from BSA-coated surfaces were subtracted as a negative control. Data are shown as mean  $\pm$  S.D. from 3-4 independent experiments.

**Modeling of GPIb $\alpha$ -PDI binding.** Coordinates of X-ray models of human GPIb $\alpha$  (protein data bank (PDB: 3P72)<sup>10</sup> and reduced (PDB: 4EKZ) and oxidized forms (PDB: 4EL1)<sup>11</sup> of human PDI were downloaded from the PDB. All molecular modeling studies were performed in Molecular Operating Environment (MOE).<sup>12</sup> The docking was unbiased and did not contain any pharmacophore requirements. The proteins were subjected to the

“structure preparation” procedure. Hydrogen atoms were added using the Protonate 3D algorithm. The energy of the resulting structure was minimized utilizing AMBER12EHT forcefield.<sup>13</sup> A short peptide found in GPIb $\alpha$  was removed. The proteins were minimized until the root mean square gradient was less than 0.001 kcal/mol/Å<sup>2</sup>. The MOE module “Dock” for protein-protein docking was used to dock GPIb $\alpha$  to PDI using the default parameters and settings. Docking was performed using the “Rigid Body” refinement algorithm and “GBVI/WSA dG” function for rescoring of the resulting poses. A total of 100 poses were stored after the refinement step. The docking poses where the missing C-terminal of GPIb $\alpha$  was covered by PDI were discarded, and only those poses that did not have overlap with the missing C-terminal portion of GPIb $\alpha$  were considered for further analysis.

**Free thiol labeling.** GPIb $\alpha$  (50 nM) was incubated with either wtPDI or dmPDI (100 nM) for 10 minutes at 37°C, followed by incubation with 100  $\mu$ M MPB for 30 minutes at 37°C in the presence of a mixture of GSH:GSSG (0:0, 1:0.33, or 1:0.05 mM). After quenching the reaction with 1 mM GSH, proteins were electrophoresed under reduced conditions and blotted with peroxidase-conjugated avidin or antibodies against GPIb $\alpha$  or PDI.

**Mass spectrometry.** The active site disulfide bond of PDI was reduced with 10 mM dithiothreitol for 30 minutes at room temperature, and the reducing agent was removed by a spin desalting column. Recombinant human GPIb $\alpha$  (His17-Leu505), 1.8  $\mu$ M, was incubated without or with a 2- or 10-fold molar excess of wtPDI or dmPDI for 30 minutes at room temperature. Unpaired Cys thiols in GPIb $\alpha$  were alkylated with 5 mM 2-iodo-N-



phenylacetamide ( $^{12}\text{C}$ -IPA labeling free thiol groups of Cys residues forming allosteric disulfide bonds) for 1 hour at room temperature. The proteins were separated on SDS-PAGE and stained with SYPRO Ruby. The GPIIb $\alpha$  band was excised, destained, dried and incubated with 40 mM dithiothreitol. The fully reduced GPIIb $\alpha$  was alkylated for 1 hour at 25 °C with 5 mM  $^{13}\text{C}$ -labeled IPA ( $^{13}\text{C}$ -IPA) where all 6 carbon atoms of the phenyl ring have a mass of 13. GPIIb $\alpha$  was digested with 12.5  $\mu\text{g}/\text{ml}$  trypsin in 25 mM  $\text{NH}_4\text{CO}_2$  overnight at room temperature. Peptides were eluted from the slices with 5% formic acid and 50% acetonitrile, dried and reconstituted in 12  $\mu\text{l}$  of 0.1% formic acid. Using a Thermo Fisher Scientific Ultimate 3000, peptides (3  $\mu\text{l}$ ) were injected and resolved on a 35 cm x 75  $\mu\text{m}$  C18 reverse phase analytical column with integrated emitter over a gradient from 2% acetonitrile to 35% acetonitrile over 22 minutes with a flow rate of 200 nl/minute. The peptides were ionized by electrospray ionization at +2.0 kV. Tandem mass spectrometry analysis was carried out on a Q-Exactive Plus mass spectrometer (Thermo Fisher Scientific) using CID fragmentation. The data-dependent acquisition method acquired MS/MS spectra on the top 5 most abundant ions at any one point during the gradient. The data produced were searched using Mascot (Matrix Science) against UniProt database. Search parameters were as follows: precursor tolerance of 6 ppm and product ion tolerances of  $\pm 0.4$  Da. Cys- $^{12}\text{C}$ -IPA, Cys- $^{13}\text{C}$ -IPA, oxidized Met, pyro-Glu pyro-Gln were selected as variable modifications with full tryptic cleavage of up to three missed cleavages. To calculate ion abundance of peptides, extracted ion chromatograms were generated using the XCalibur Qual Browser software (v2.1.0; Thermo Scientific). The area was calculated using the automated peak detection function built into the software. The fraction of reduced disulfide bond was measured from the relative ion

abundance of peptides containing  $^{12}\text{C}$ -IPA and  $^{13}\text{C}$ -IPA. The ratio of  $^{12}\text{C}$ -IPA to  $^{13}\text{C}$ -IPA labeling of the Cys-containing peptides represented the fraction of the reduced disulfide bonds in GPIb $\alpha$ .

**Chinese hamster ovary (CHO) cell transfection.** The cDNAs of human wt or mutant (Cys4Ser or Cys209Ser) GPIb $\alpha$ , GPIb $\beta$  or GPIX were cloned into the pcDNA3.1 expression vector as described previously.<sup>14</sup> Site-directed mutagenesis for a Cys-to-Ser point mutation at the position of Cys4 or Cys209 was performed using QuikChange Multi Site-Directed Mutagenesis kit with the following primers: For the Cys4Ser mutation, a forward primer as 5'-CCCCACCCCATCTCCGAGGTCTCCAA-3', and a reverse primer as 5'-CTTTGGAGACCTCGGAGATGGGGTGGG-3'. For the Cys209Ser mutation, a forward primer as 5'-GGGAACCCCTGGTTATCTAACTGTGAGATCCTC-3', and a reverse primer as 5'-GAGGATCTCACAGTTAGATAACCAGGGGTCC-3'. The cDNAs were co-transfected into CHO cells using Lipofectamine 2000 according to the manufacturer's instructions. Cells were harvested with 1 mM EDTA after 60 hours of transfection. CHO cells expressing wt or mutant GPIb-IX ( $5 \times 10^5$ ) were suspended in HEPES-Tyrode buffer. The expression of cell surface GPIb $\alpha$  was detected by flow cytometer using three different anti-GPIb $\alpha$  antibodies: HIP1 that recognizes the N-terminal vWF-binding domain, SZ2 that binds to the anionic sulfated tyrosine region, and MM2/174 that recognizes the elastase-resistant part of GPIb $\alpha$ .<sup>15-17</sup> In some experiments, cells were incubated with 35  $\mu\text{g}/\text{ml}$  vWF and 2  $\text{mg}/\text{ml}$  ristocetin in an aggregometer at 37°C with stirring at 200g for 10 minutes. The unbound vWF was washed out by centrifugation at 800g for 5 minutes. Cells were treated with isotype control IgG or anti-

GPIb $\alpha$  antibodies (MM2/174), followed by incubation with Alexa Fluor 647-conjugated anti-mouse IgG antibodies. Then, cells were incubated with FITC-conjugated control IgG or anti-vWF antibodies.

***In vitro* heterotypic platelet-neutrophil aggregation.** Platelet-neutrophil aggregation assays were performed as previously described.<sup>2</sup> Platelets ( $2 \times 10^7$ ) and neutrophils ( $1 \times 10^6$ ) isolated from WT and PDI CKO mice were labeled with DyLight 488-conjugated anti-CD42c and Alexa Fluor 647-conjugated anti-Ly-6G antibodies, respectively. Human neutrophils and platelets were labeled with Alexa Fluor 488-conjugated anti-CD41 and FITC-conjugated anti-L-selectin antibodies, respectively. Neutrophils were stimulated with 20 ng/ml TNF- $\alpha$  for 5 minutes. Platelets were pretreated with or without control IgG or a blocking anti-PDI antibody (10  $\mu$ g/ml), BSA or Anfibatide (0.2  $\mu$ g/ml), or both inhibitors for 30 minutes at room temperature and then activated with 0.025 U/ml thrombin for 5 minutes at 37°C, followed by incubation with 50  $\mu$ M PPACK. Activated platelets were mixed with stimulated neutrophils under a stirring condition of 1,000 rpm in an aggregometer. After a 5-minute incubation, cells were fixed and analyzed by flow cytometry. Cell-cell aggregation was assessed by the number of cell-cell aggregates in the R3 gate and the mean fluorescence intensities (MFI) of anti-CD42c antibodies (Heterotypic interaction) in the R1 gate. Data were presented as the percentage of the number of cell aggregates (for cell-cell aggregates) or the MFI value (for heterotypic interaction) normalized to a control group (WT platelets/neutrophils or control IgG-treated cells). In some experiments, antibody-labeled platelets and neutrophils were mixed under stirring and cytopinned at 200g for 10 minutes. Fluorescence images were captured with

a Nikon microscope (ECLIPSE Ti, Melville, NY) equipped with a Plan Fluor  $\times 40/1.30\text{NA}$  oil objective lens and recorded with a digital camera (CoolSNAP ES2) as described previously.<sup>18</sup> The data were analyzed using NIS-Elements (AR 3.2; Nikon).

**Proximity ligation assay.** WT control and PDI CKO mice were treated with intrascrotal injection of TNF- $\alpha$ , 500 ng. Three hours later, the cremaster muscle was removed and mounted on dental wax to retain the stretched conformation of the tissue. The muscle was washed with PBS and cryopreserved in optimal cutting temperature compound. The frozen blocks were cryosectioned and then mounted to slides. The thawed slides were rehydrated in PBS for 10 minutes at room temperature and blocked with the blocking solution provided by Duolink® In Situ Red Proximity Ligation Assay kit at 37°C for 1 hour, followed by incubation with nonimmune goat IgG and rabbit IgG, or goat anti-PDI and rabbit anti-GPIIb $\alpha$  antibodies (1  $\mu\text{g}/\text{ml}$ ) at room temperature for 1 hour. Duolink proximity ligation assay was performed according to the manufacturer's instructions. After washing, platelets and neutrophils were labeled with DyLight 488-conjugated anti-CD42c and Alexa Fluor 647-conjugated anti-Ly-6G antibodies (10  $\mu\text{g}/\text{ml}$ ), respectively. The slides were mounted with Vectashield containing DAPI. Images were acquired on a Zeiss LSM 880 confocal microscope (Carl Zeiss AG, Germany) equipped with a Plan Apochromatic 63x/1.4 oil immersion objective. The number of platelets and the PLA signal (i.e. single dots) were counted using a Zen 2 (blue edition) software (Carl Zeiss AG, Germany). Twenty vessels in 6 different sections were acquired from three different mice per group. The number of PLA puncta was normalized to the number of platelets in each vessel.

**Ischemia/reperfusion-induced stroke.** Both male and female C57BL/6 mice, WT, platelet-specific PDI CKO mice (22-25g, 7-10 weeks old) were anesthetized 2% isoflurane in oxygen mixture and treated by ip injection of buprenorphine (30 ng/g BW, i.p.). The body temperature was maintained at 37°C throughout surgery using a heating blanket. The left common carotid artery was exposed, followed by dissection of the external carotid artery and isolation of the internal carotid artery. A left middle cerebral artery was occluded with a monofilament (0.15 mm in diameter, the tip diameter is 0.22-0.25 mm, 5-0 DERMALON, Syneture) for 1 hour. A successful occlusion was indicated by a decrease in the regional cerebral blood flow to <20% of the baseline using a laser Doppler perfusion monitoring system (PF5010, Perimed AB, Ardmore, PA). The filament was then removed, and blood flow was restored to the baseline. BSA or Anfibatide (5 or 25 ng/g BW in 100 µl saline) was intravenously infused into mice after 1-hour occlusion. The experiments were performed in a single-blind manner. After re-injection of buprenorphine (25 ng/g BW i.p.), mice were subjected to 23 hours of reperfusion. Neurological function was then assessed using the Bederson score<sup>19</sup> and Wire suspension test (grip test).<sup>20</sup> For measuring Bederson score, neurological deficits were scored according to the following system: 0, no observable deficit; 1, forelimb flexion; 2, forelimb flexion and decreased resistance to lateral push; 3, forelimb flexion, decreased resistance to lateral push, and circle to paretic side. For the wire suspension test of grip strength and endurance, the mouse placed on a horizontal string (0.5 mm thick, 50 cm in length, 40 cm above a tabletop). The mouse was assessed according to the following system: 0, falls off; 1, hung onto the string with two forepaws; 2, in addition to 1, attempted to climb onto string; 3, hung onto the string with two forepaws and one or both hindpaws; 4, hung onto the string

with four paws with tail wrapped around the string; 5, escape to the edge of the string. After the assessment, mice were sacrificed, and brains were taken out. The 2-mm brain slices were stained with 2% 2,3,5-triphenyltetrazolium chloride solution (Sigma-Aldrich) for 10 minutes at 37°C, followed by fixation with 4% paraformaldehyde. Sections were scanned, and the infarct volumes were measured using Image J.

## REFERENCES

1. Andrews RK, Booth WJ, Gorman JJ, Castaldi PA and Berndt MC. Purification of botrocetin from Bothrops jararaca venom. Analysis of the botrocetin-mediated interaction between von Willebrand factor and the human platelet membrane glycoprotein Ib-IX complex. *Biochemistry*. 1989;28:8317-8326.
2. Kim K, Li J, Tseng A, Andrews RK and Cho J. NOX2 is critical for heterotypic neutrophil-platelet interactions during vascular inflammation. *Blood*. 2015;126:1952-1964.
3. Hahm E, Li J, Kim K, Huh S, Rogelj S and Cho J. Extracellular protein disulfide isomerase regulates ligand-binding activity of alphaMbeta2 integrin and neutrophil recruitment during vascular inflammation. *Blood*. 2013;121:3789-3800.
4. Planesse C, Nativel B, Iwema T, Gasque P, Robert-Da Silva C and Viranaicken W. Recombinant human HSP60 produced in ClearColi BL21(DE3) does not activate the NFkappaB pathway. *Cytokine*. 2015;73:190-195.
5. Cheng X, Qian Y, Liu Q, Li BX, Zhang M and Liu J. Purification, characterization, and cDNA cloning of a new fibrinogenolytic venom protein, Agkisacutacin, from *Agkistrodon acutus* venom. *Biochem Biophys Res Commun*. 1999;265:530-535.
6. Gardiner EE, Karunakaran D, Shen Y, Arthur JF, Andrews RK and Berndt MC.

Controlled shedding of platelet glycoprotein (GP)VI and GPIb-IX-V by ADAM family metalloproteinases. *J Thromb Haemost.* 2007;5:1530-1537.

7. Deng W, Xu Y, Chen W, Paul DS, Syed AK, Dragovich MA, Liang X, Zakas P, Berndt MC, Di Paola J, Ware J, Lanza F, Doering CB, Bergmeier W, Zhang XF and Li R. Platelet clearance via shear-induced unfolding of a membrane mechanoreceptor. *Nat Commun.* 2016;7:12863.

8. Padilla A, Moake JL, Bernardo A, Ball C, Wang Y, Arya M, Nolasco L, Turner N, Berndt MC, Anvari B, Lopez JA and Dong JF. P-selectin anchors newly released ultralarge von Willebrand factor multimers to the endothelial cell surface. *Blood.* 2004;103:2150-2156.

9. Weisel JW, Nagaswami C, Vilaire G and Bennett JS. Examination of the platelet membrane glycoprotein IIb-IIIa complex and its interaction with fibrinogen and other ligands by electron microscopy. *J Biol Chem.* 1992;267:16637-16643.

10. McEwan PA, Andrews RK and Emsley J. Glycoprotein Ibalpha inhibitor complex structure reveals a combined steric and allosteric mechanism of von Willebrand factor antagonism. *Blood.* 2009;114:4883-4885.

11. Wang C, Li W, Ren J, Fang J, Ke H, Gong W, Feng W and Wang CC. Structural insights into the redox-regulated dynamic conformations of human protein disulfide isomerase. *Antioxid Redox Signal.* 2013;19:36-45.

12. Molecular Operating Environment (MOE) CCGU, 1010 Sherbooke St. West, Suite #910, Montreal, QC, Canada, H3A 2R7, 2018.

13. Gerber PR and Muller K. MAB, a generally applicable molecular force field for structure modelling in medicinal chemistry. *J Comput Aided Mol Des.* 1995;9:251-268.

14. Dai K, Bodnar R, Berndt MC and Du X. A critical role for 14-3-3zeta protein in regulating the VWF binding function of platelet glycoprotein Ib-IX and its therapeutic implications. *Blood*. 2005;106:1975-1981.
15. Kuijpers RW, Ouwehand WH, Bleeker PM, Christie D and von dem Borne AE. Localization of the platelet-specific HPA-2 (Ko) alloantigens on the N-terminal globular fragment of platelet glycoprotein Ib alpha. *Blood*. 1992;79:283-288.
16. Simon DI, Chen Z, Xu H, Li CQ, Dong J, McIntire LV, Ballantyne CM, Zhang L, Furman MI, Berndt MC and Lopez JA. Platelet glycoprotein Ibalpha is a counterreceptor for the leukocyte integrin Mac-1 (CD11b/CD18). *J Exp Med*. 2000;192:193-204.
17. Kunishima S, Matsushita T, Ito T, Kamiya T and Saito H. Novel nonsense mutation in the platelet glycoprotein Ibbeta gene associated with Bernard-Soulier syndrome. *Am J Hematol*. 2002;71:279-284.
18. Li J, Kim K, Hahm E, Molokie R, Hay N, Gordeuk VR, Du X and Cho J. Neutrophil AKT2 regulates heterotypic cell-cell interactions during vascular inflammation. *J Clin Invest*. 2014;124:1483-1496.
19. Bederson JB, Pitts LH, Tsuji M, Nishimura MC, Davis RL and Bartkowski H. Rat middle cerebral artery occlusion: evaluation of the model and development of a neurologic examination. *Stroke*. 1986;17:472-476.
20. Moran PM, Higgins LS, Cordell B and Moser PC. Age-related learning deficits in transgenic mice expressing the 751-amino acid isoform of human beta-amyloid precursor protein. *Proc Natl Acad Sci U S A*. 1995;92:5341-5345.



**Supplemental Table S1. Allosteric disulfide bonds in platelet surface proteins.**

| Family        | Receptor  | Cysteine      | Allosteric configuration | PDB ID*                                                                                                                                                              | References          |
|---------------|-----------|---------------|--------------------------|----------------------------------------------------------------------------------------------------------------------------------------------------------------------|---------------------|
| β3 integrin   | αIIb      | Cys56-Cys65   | -RHStaple                | 1TYE, 2VC2, 2VDK, 2VDL, 2VDM, 2VDN, 2VDO, 2VDP, 2VDQ, 2VDR, 3FCS, 3FCU, 3NID, 3NIF, 3NIG, 3T3M, 3T3P, 3ZDX, 3ZDY, 3ZDZ, 3ZE0, 3ZE1, 3ZE2, 4Z7N, 4Z7O, 4Z7Q, and 5HDB | 1, 2, 3, 4, 5, 6, 7 |
|               |           | Cys107-Cys130 | -RHStaple                |                                                                                                                                                                      |                     |
|               |           | Cys146-Cys167 | -LHHook                  |                                                                                                                                                                      |                     |
|               |           | Cys602-Cys608 | -LHHook                  |                                                                                                                                                                      |                     |
|               |           | Cys473-Cys484 | -/+RHHook                |                                                                                                                                                                      |                     |
|               |           | Cys490-Cys545 | -RHStaple                |                                                                                                                                                                      |                     |
|               |           | Cys674-Cys687 | -RHStaple                |                                                                                                                                                                      |                     |
|               |           | Cys826-Cys890 | -RHStaple                |                                                                                                                                                                      |                     |
|               | β3        | Cys26-Cys49   | -LHHook                  |                                                                                                                                                                      |                     |
| Cys177-Cys184 | -/+RHHook |               |                          |                                                                                                                                                                      |                     |
| Cys406-Cys433 | -/+RHHook |               |                          |                                                                                                                                                                      |                     |
| Cys437-Cys457 | -/+RHHook |               |                          |                                                                                                                                                                      |                     |
| Cys462-Cys471 | -LHHook   |               |                          |                                                                                                                                                                      |                     |
| Cys473-Cys503 | -/+RHHook |               |                          |                                                                                                                                                                      |                     |
| Cys523-Cys544 | -LHHook   |               |                          |                                                                                                                                                                      |                     |
| Cys560-Cys583 | -LHHook   |               |                          |                                                                                                                                                                      |                     |
| Cys614-Cys635 | -/+RHHook |               |                          |                                                                                                                                                                      |                     |
| Cys663-Cys687 | -RHStaple |               |                          |                                                                                                                                                                      |                     |
| β3 integrin   | αv        | Cys59-Cys67   | -RHStaple                | 4G1M, 3IJE, 1L5G, 1M1X, 4MMX, 4MMY, 4MMZ, and 4O02                                                                                                                   | 8, 9, 10, 11, 12    |
|               |           | Cys108-Cys128 | -RHStaple                |                                                                                                                                                                      |                     |
|               |           | Cys142-Cys155 | -/+RHHook                |                                                                                                                                                                      |                     |
|               |           | Cys478-Cys535 | -LHHook,-RHStaple        |                                                                                                                                                                      |                     |
|               |           | Cys596-Cys602 | -LHHook                  |                                                                                                                                                                      |                     |
|               |           | Cys668-Cys681 | -RHStaple                |                                                                                                                                                                      |                     |
|               |           | Cys822-Cys884 | -RHStaple                |                                                                                                                                                                      |                     |
|               |           | Cys874-Cys879 | -RHStaple                |                                                                                                                                                                      |                     |
|               | β3        | Cys13-Cys435  | -LHHook                  |                                                                                                                                                                      |                     |
| Cys177-Cys184 | -/+RHHook |               |                          |                                                                                                                                                                      |                     |
| Cys406-Cys433 | -/+RHHook |               |                          |                                                                                                                                                                      |                     |
| Cys437-Cys457 | -/+RHHook |               |                          |                                                                                                                                                                      |                     |
| Cys448-Cys460 | -/+RHHook |               |                          |                                                                                                                                                                      |                     |

|                           |                             |                                                                                                                     |                                                                                       |                                              |                |
|---------------------------|-----------------------------|---------------------------------------------------------------------------------------------------------------------|---------------------------------------------------------------------------------------|----------------------------------------------|----------------|
|                           |                             | Cys462-Cys471<br>Cys486-Cys501<br>Cys495-Cys506<br>Cys523-Cys544<br>Cys560-Cys583<br>Cys617-Cys631<br>Cys663-Cys687 | -LHHook<br>-LHHook<br>-LHHook<br>-LHHook,-RHStaple<br>-LHHook<br>-LHHook<br>-RHStaple |                                              |                |
| β1 integrin               | α2                          | No allosteric configuration                                                                                         |                                                                                       | 1AOX                                         | 13             |
|                           | α5                          | Cys58-Cys67                                                                                                         | -RHStaple                                                                             | 3VI4, 4WJK, and<br>4WK2                      | 14, 15         |
|                           |                             | Cys115-Cys135                                                                                                       | -RHStaple                                                                             |                                              |                |
|                           | Cys487-Cys543               | -RHStaple                                                                                                           |                                                                                       |                                              |                |
| β1                        | Cys7-Cys25                  | -LHHook                                                                                                             |                                                                                       |                                              |                |
|                           |                             | Cys15-Cys444                                                                                                        | -LHHook                                                                               |                                              |                |
|                           |                             | Cys28-Cys55                                                                                                         | -LHHook                                                                               |                                              |                |
|                           | α6                          | No allosteric configuration                                                                                         |                                                                                       | Not available                                |                |
| GPIb-IX-V                 | GPIbα                       | Cys4-Cys17                                                                                                          | -RHStaple                                                                             | 1M0Z, 1M10, 1OOK,<br>1P9A, 1QYY, and<br>3P72 | 16, 17, 18, 19 |
|                           |                             | Cys209-Cys248                                                                                                       | -LHHook                                                                               |                                              |                |
|                           | GPIbβ                       | Cys5-Cys14                                                                                                          | -RHStaple                                                                             | 3REZ and 3RFE                                | 20             |
|                           |                             | Cys68-Cys93                                                                                                         | -LHHook                                                                               |                                              |                |
|                           | GPIX                        | No allosteric configuration                                                                                         |                                                                                       | 3REZ                                         | 20             |
| GPV                       | No allosteric configuration |                                                                                                                     | Not available                                                                         |                                              |                |
| Toll-like receptors (TLR) | TLR1                        | Cys223-Cys230                                                                                                       | -/+RHHook                                                                             | 1FYV and 2Z7X                                | 21, 22         |
|                           |                             | Cys667-Cys686                                                                                                       | -/+RHHook                                                                             |                                              |                |
|                           | TLR2                        | Cys10-Cys16                                                                                                         | -RHStaple                                                                             | 2Z7X and 2Z80                                | 22             |
|                           |                             | Cys295-Cys320                                                                                                       | -LHHook                                                                               |                                              |                |
|                           |                             | Cys517-Cys542                                                                                                       | -LHHook                                                                               |                                              |                |
|                           | TLR4                        | Cys6-Cys17                                                                                                          | -RHStaple                                                                             | 2Z62, 3UL7, 3UL8,<br>3UL9, and 4G8A          | 23, 24, 25     |
|                           |                             | Cys241-Cys266                                                                                                       | -LHHook                                                                               |                                              |                |
| Cys367-Cys368             |                             | -RHStaple                                                                                                           |                                                                                       |                                              |                |
| Cys560-Cys586             |                             | -LHHook                                                                                                             |                                                                                       |                                              |                |
| TLR6                      | No allosteric configuration |                                                                                                                     | 4OM7                                                                                  | 26                                           |                |
| TLR7                      | No allosteric configuration |                                                                                                                     | Not available                                                                         |                                              |                |
| TLR9                      | No allosteric configuration |                                                                                                                     | Not available                                                                         |                                              |                |
| Thrombin receptors        | PAR1                        | No allosteric configuration                                                                                         |                                                                                       | Not available                                |                |
|                           | PAR4                        | No allosteric configuration                                                                                         |                                                                                       | Not available                                |                |

|                         |                               |                                                                            |                                                     |                                                          |                        |
|-------------------------|-------------------------------|----------------------------------------------------------------------------|-----------------------------------------------------|----------------------------------------------------------|------------------------|
| ADP receptors           | P2Y1                          | No allosteric configuration                                                |                                                     | 4XNV and 4XNW                                            | 27                     |
|                         | P2Y12                         | No allosteric configuration                                                |                                                     | 4PXZ and 4PY0                                            | 28                     |
| Prostaglandin receptors | Thromboxane receptor A2       | No allosteric configuration                                                |                                                     | 1LBN                                                     | Theoretical model      |
|                         | PGI2 receptor                 | No allosteric configuration                                                |                                                     | Not available                                            |                        |
|                         | PGD2 receptor                 | No allosteric configuration                                                |                                                     | Not available                                            |                        |
|                         | PGE2 receptor                 | No allosteric configuration                                                |                                                     | Not available                                            |                        |
| Vasopressin receptor    | V1a receptor                  | No allosteric configuration                                                |                                                     | 1YTV                                                     | 29                     |
| Adenosine receptor      | A2a receptor                  | Cys74-Cys146<br>Cys77-Cys166                                               | -LHHook<br>-LHHook                                  | 3VG9 and 3VGA                                            | 30                     |
| Epinephrine receptor    | $\beta$ 2-Adrenergic receptor | Cys184-Cys190                                                              | -LHHook                                             | 2RH1, 3NY8, 3NY9, 3NYA, 3P0G, 3PDS, 5D5A, 5D5B, and 5D6L | 31, 32, 33, 34, 35, 36 |
| Serotonin receptor      | 5-HT2A receptor               | No allosteric configuration                                                |                                                     | Not available                                            |                        |
| Dopamine receptor       | D3                            | No allosteric configuration                                                |                                                     | 3PBL                                                     | 37                     |
|                         | D5                            | No allosteric configuration                                                |                                                     | Not available                                            |                        |
| Chemokine receptor      | CXCR1                         | No allosteric configuration                                                |                                                     | 2LNL, 1ILP, and 1ILQ                                     | 38                     |
|                         | CXCR2                         | No allosteric configuration                                                |                                                     | 5TYT                                                     | 39                     |
|                         | CXCR4                         | Cys28-Cys274                                                               | -LHHook                                             | 3OE8 and 3OE9                                            | 40                     |
|                         | CCR1                          | No allosteric configuration                                                |                                                     | 1Y5D                                                     | Theoretical model      |
|                         | CCR3                          | No allosteric configuration                                                |                                                     | Not available                                            |                        |
|                         | CCR4                          | No allosteric configuration                                                |                                                     | Not available                                            |                        |
| Collagen receptor       | GPVI                          | No allosteric configuration                                                |                                                     | 2G17                                                     | 41                     |
|                         | CLEC-2                        | No allosteric configuration                                                |                                                     | 3WSR and 2C6U                                            | 42, 43                 |
|                         | CD40                          | Cys6-Cys17<br>Cys85-Cys99<br>Cys91-Cys96<br>Cys105-Cys123<br>Cys147-Cys166 | -LHHook<br>-LHHook<br>-LHHook<br>-LHHook<br>-LHHook | 5DMI, 5DMJ, and 5IHL                                     | 44                     |
|                         | CD40L                         | No allosteric configuration                                                |                                                     | 3QD6                                                     | 45                     |

|                                                              |            |                              |                    |                                                    |                         |
|--------------------------------------------------------------|------------|------------------------------|--------------------|----------------------------------------------------|-------------------------|
|                                                              | P-selectin | No allosteric configuration  |                    | 1FSB, 1G1Q, 1G1R, and 1G1S                         | 46, 47                  |
| Junctional adhesion molecules                                | JAM-C      | No allosteric configuration  |                    | Not available                                      |                         |
| Intercellular adhesion molecules                             | ICAM-2     | No allosteric configuration  |                    | 1ZXQ                                               | 48                      |
| Complement receptor                                          | C1qRp      | No allosteric configuration  |                    | Not available                                      |                         |
| Anaphylatoxin receptors                                      | C3aR       | No allosteric configuration  |                    | Not available                                      |                         |
|                                                              | C5aR       | No allosteric configuration  |                    | 5O9H                                               | 49                      |
| Major histocompatibility complex class                       | MHC-1      | Cys203-Cys259                | -LHHook            | 3RWC, 3RWD, 3RWE, 3RWF, 3RWG, 3RWH, 3RWI, and 3RWJ | 50                      |
| Sialic acid-binding receptors                                | Siglec-7   | No allosteric configuration  |                    | 1NKO, 1O7S, 1O7V, 2DF3, 2G5R, and 2HRL             | 51, 52, 53, 54          |
|                                                              | Siglec-9   | No allosteric configuration  |                    | Not available                                      |                         |
|                                                              | Siglec-11  | No allosteric configuration  |                    | Not available                                      |                         |
|                                                              | CD36       | No allosteric configuration  |                    | 5LGD                                               | 55                      |
| Nucleotide-binding oligomerization domain-containing protein | NOD2       | No allosteric configuration  |                    | 5IRL, 5IRM, and 5IRN                               | 56                      |
| Scavenger receptor                                           | SRB1       | No allosteric configuration  |                    | 5KTF and 3R69                                      | 57,58                   |
|                                                              | PECAM-1    | Cys30-Cys82<br>Cys125-Cys179 | -LHHook<br>-LHHook | 2KY5, 5C14, and 5GNI                               | 59, 60, 61              |
| Insulin receptor                                             | INSR       | Cys8-Cys26                   | -LHHook            | 1GAG, 1I44, 1IR3,                                  | 62, 63, 64, 65, 66, 67, |

|                                         |                |                                |                        |                                                                                                                                                                            |                                                                                |
|-----------------------------------------|----------------|--------------------------------|------------------------|----------------------------------------------------------------------------------------------------------------------------------------------------------------------------|--------------------------------------------------------------------------------|
|                                         |                |                                |                        | 1IRK, 1P14, 1RQQ, 2AUH, 2B4S, 2HR7, 2MFR, 2Z8C, 3BU3, 3BU5, 3BU6, 3EKK, 3EKN, 3ETA, 3W11, 4XLV, 4XSS, 4XST, 4ZXB, 5E1S, 5HHW, 5J3H, 5KQV, 5U1M, 3W12, 3W13, 4IBM, and 4OGA | 68, 69, 70, 71, 72, 73, 74, 75, 76, 77, 78, 79, 80, 81, 82, 76, 83, 76, 84, 85 |
| Leptin receptor                         | LEPR           | Cys415-Cys426<br>Cys467-Cys477 | -RHStaple<br>-RHStaple | 3V6O                                                                                                                                                                       | 86                                                                             |
| Platelet-activating factor receptor     | PAF-R          | No allosteric configuration    |                        | 2B0X                                                                                                                                                                       | Theoretical model                                                              |
| TREM-like transcript-1                  | TLT-1          | No allosteric configuration    |                        | 2FRG                                                                                                                                                                       | 87                                                                             |
| Tyrosine-protein kinase receptor        | Tie-1          | No allosteric configuration    |                        | 5N06                                                                                                                                                                       | 88                                                                             |
| SLAM family member                      | CD84 (SLAMF5)  | No allosteric configuration    |                        | 2PKD                                                                                                                                                                       | 89                                                                             |
|                                         | CD150 (SLAMF1) | No allosteric configuration    |                        | 1M27                                                                                                                                                                       |                                                                                |
| Platelet-derived growth factor receptor | PDGFR1         | No allosteric configuration    |                        | 1GQ5, 1H9O, 1LWP, 1SHA, 2L6W, 2PLD, 2PLE, and 3MJG                                                                                                                         | 90, 91, 92, 93, 94, 95                                                         |
|                                         | PDGFR2         | No allosteric configuration    |                        | 1GQ5 and 5GRN                                                                                                                                                              | 90                                                                             |

\*: Protein Data Bank Identifier

## References

1. Xiao T, Takagi J, Collier BS, Wang JH and Springer TA. Structural basis for allostery in integrins and binding to fibrinogen-mimetic therapeutics. *Nature*. 2004;432:59-67.
2. Springer TA, Zhu J and Xiao T. Structural basis for distinctive recognition of fibrinogen gammaC peptide by the platelet integrin alphaIIb beta3. *J Cell Biol*. 2008;182:791-800.
3. Zhu J, Luo BH, Xiao T, Zhang C, Nishida N and Springer TA. Structure of a complete integrin ectodomain in a physiologic resting state and activation and deactivation by applied forces. *Mol Cell*. 2008;32:849-861.
4. Zhu J, Zhu J, Negri A, Provasi D, Filizola M, Collier BS and Springer TA. Closed headpiece of integrin alphaIIb beta3 and its complex with an alphaIIb beta3-specific antagonist that does not induce opening. *Blood*. 2010;116:5050-5059.
5. Zhu J, Choi WS, McCoy JG, Negri A, Zhu J, Naini S, Li J, Shen M, Huang W, Bougie D, Rasmussen M, Aster R, Thomas CJ, Filizola M, Springer TA and Collier BS. Structure-guided design of a high-affinity platelet integrin alphaIIb beta3 receptor antagonist that disrupts Mg(2)(+) binding to the MIDAS. *Sci Transl Med*. 2012;4:125ra32.
6. Zhu J, Zhu J and Springer TA. Complete integrin headpiece opening in eight steps. *J Cell Biol*. 2013;201:1053-1068.
7. Lin FY, Zhu J, Eng ET, Hudson NE and Springer TA. beta-Subunit Binding Is Sufficient for Ligands to Open the Integrin alphaIIb beta3 Headpiece. *J Biol Chem*. 2016;291:4537-4546.
8. Dong X, Mi LZ, Zhu J, Wang W, Hu P, Luo BH and Springer TA. alpha(V)beta(3) integrin crystal structures and their functional implications. *Biochemistry*. 2012;51:8814-8828.
9. Xiong JP, Stehle T, Zhang R, Joachimiak A, Frech M, Goodman SL and Arnaout MA. Crystal structure of the extracellular segment of integrin alpha V beta3 in complex with an Arg-Gly-Asp ligand. *Science*. 2002;296:151-155.
10. Van Agthoven JF, Xiong JP, Alonso JL, Rui X, Adair BD, Goodman SL and Arnaout MA. Structural basis for pure antagonism of integrin alphaV beta3 by a high-affinity form of fibronectin. *Nat Struct Mol Biol*. 2014;21:383-388.
11. Mahalingam B, Van Agthoven JF, Xiong JP, Alonso JL, Adair BD, Rui X, Anand S, Mehrbod M, Mofrad MR, Burger C, Goodman SL and Arnaout MA. Atomic basis for the species-specific inhibition of alphaV integrins by monoclonal antibody 17E6 is revealed by the crystal structure of alphaV beta3 ectodomain-17E6 Fab complex. *J Biol Chem*. 2014;289:13801-13809.
12. Dong X, Zhao B, Iacob RE, Zhu J, Koksai AC, Lu C, Engen JR and Springer TA. Force interacts with macromolecular structure in activation of TGF-beta. *Nature*. 2017;542:55-59.
13. Emsley J, King SL, Bergelson JM and Liddington RC. Crystal structure of the I domain from integrin alpha2 beta1. *J Biol Chem*. 1997;272:28512-28517.
14. Nagae M, Re S, Mihara E, Nogi T, Sugita Y and Takagi J. Crystal structure of alpha5 beta1 integrin ectodomain: atomic details of the fibronectin receptor. *J Cell Biol*. 2012;197:131-140.
15. Xia W and Springer TA. Metal ion and ligand binding of integrin alpha5 beta1. *Proc. Natl. Acad. Sci. U.S.A.* 2014;111:17863-17868.

16. Huizinga EG, Tsuji S, Romijn RA, Schiphorst ME, de Groot PG, Sixma JJ and Gros P. Structures of glycoprotein Ibalpha and its complex with von Willebrand factor A1 domain. *Science*. 2002;297:1176-1179.
17. Celikel R, McClintock RA, Roberts JR, Mendolicchio GL, Ware J, Varughese KI and Ruggeri ZM. Modulation of alpha-thrombin function by distinct interactions with platelet glycoprotein Ibalpha. *Science*. 2003;301:218-221.
18. Varughese KI, Ruggeri ZM and Celikel R. Platinum-induced space-group transformation in crystals of the platelet glycoprotein Ib alpha N-terminal domain. *Acta Crystallogr D Biol Crystallogr*. 2004;60:405-411.
19. McEwan PA, Andrews RK and Emsley J. Glycoprotein Ibalpha inhibitor complex structure reveals a combined steric and allosteric mechanism of von Willebrand factor antagonism. *Blood*. 2009;114:4883-4885.
20. McEwan PA, Yang W, Carr KH, Mo X, Zheng X, Li R and Emsley J. Quaternary organization of GPIb-IX complex and insights into Bernard-Soulier syndrome revealed by the structures of GPIbbeta and a GPIbbeta/GPIX chimera. *Blood*. 2011;118:5292-5301.
21. Xu Y, Tao X, Shen B, Horng T, Medzhitov R, Manley JL and Tong L. Structural basis for signal transduction by the Toll/interleukin-1 receptor domains. *Nature*. 2000;408:111-115.
22. Jin MS, Kim SE, Heo JY, Lee ME, Kim HM, Paik SG, Lee H and Lee JO. Crystal structure of the TLR1-TLR2 heterodimer induced by binding of a tri-acylated lipopeptide. *Cell*. 2007;130:1071-1082.
23. Kim HM, Park BS, Kim JI, Kim SE, Lee J, Oh SC, Enkhbayar P, Matsushima N, Lee H, Yoo OJ and Lee JO. Crystal structure of the TLR4-MD-2 complex with bound endotoxin antagonist Eritoran. *Cell*. 2007;130:906-917.
24. Han J, Kim HJ, Lee SC, Hong S, Park K, Jeon YH, Kim D, Cheong HK and Kim HS. Structure-based rational design of a Toll-like receptor 4 (TLR4) decoy receptor with high binding affinity for a target protein. *PloS one*. 2012;7:e30929.
25. Ohto U, Yamakawa N, Akashi-Takamura S, Miyake K and Shimizu T. Structural analyses of human Toll-like receptor 4 polymorphisms D299G and T399I. *J Biol Chem*. 2012;287:40611-40617.
26. Jang TH and Park HH. Crystal structure of TIR domain of TLR6 reveals novel dimeric interface of TIR-TIR interaction for toll-like receptor signaling pathway. *J Mol Biol*. 2014;426:3305-3313.
27. Zhang D, Gao ZG, Zhang K, Kiselev E, Crane S, Wang J, Paoletta S, Yi C, Ma L, Zhang W, Han GW, Liu H, Cherezov V, Katritch V, Jiang H, Stevens RC, Jacobson KA, Zhao Q and Wu B. Two disparate ligand-binding sites in the human P2Y1 receptor. *Nature*. 2015;520:317-321.
28. Zhang J, Zhang K, Gao ZG, Paoletta S, Zhang D, Han GW, Li T, Ma L, Zhang W, Muller CE, Yang H, Jiang H, Cherezov V, Katritch V, Jacobson KA, Stevens RC, Wu B and Zhao Q. Agonist-bound structure of the human P2Y12 receptor. *Nature*. 2014;509:119-122.
29. Adikesavan NV, Mahmood SS, Stanley N, Xu Z, Wu N, Thibonnier M and Shoham M. A C-terminal segment of the V1R vasopressin receptor is unstructured in the crystal structure of its chimera with the maltose-binding protein. *Acta Crystallogr Sect F Struct Biol Cryst Commun*. 2005;61:341-345.
30. Hino T, Arakawa T, Iwanari H, Yurugi-Kobayashi T, Ikeda-Suno C, Nakada-Nakura Y, Kusano-Arai O, Weyand S,

- Shimamura T, Nomura N, Cameron AD, Kobayashi T, Hamakubo T, Iwata S and Murata T. G-protein-coupled receptor inactivation by an allosteric inverse-agonist antibody. *Nature*. 2012;482:237-240.
31. Cherezov V, Rosenbaum DM, Hanson MA, Rasmussen SG, Thian FS, Kobilka TS, Choi HJ, Kuhn P, Weis WI, Kobilka BK and Stevens RC. High-resolution crystal structure of an engineered human beta2-adrenergic G protein-coupled receptor. *Science*. 2007;318:1258-1265.
  32. Wacker D, Fenalti G, Brown MA, Katritch V, Abagyan R, Cherezov V and Stevens RC. Conserved binding mode of human beta2 adrenergic receptor inverse agonists and antagonist revealed by X-ray crystallography. *J Am Chem Soc*. 2010;132:11443-11445.
  33. Rasmussen SG, Choi HJ, Fung JJ, Pardon E, Casarosa P, Chae PS, Devree BT, Rosenbaum DM, Thian FS, Kobilka TS, Schnapp A, Konetzki I, Sunahara RK, Gellman SH, Pautsch A, Steyaert J, Weis WI and Kobilka BK. Structure of a nanobody-stabilized active state of the beta(2) adrenoceptor. *Nature*. 2011;469:175-180.
  34. Rosenbaum DM, Zhang C, Lyons JA, Holl R, Aragao D, Arlow DH, Rasmussen SG, Choi HJ, Devree BT, Sunahara RK, Chae PS, Gellman SH, Dror RO, Shaw DE, Weis WI, Caffrey M, Gmeiner P and Kobilka BK. Structure and function of an irreversible agonist-beta(2) adrenoceptor complex. *Nature*. 2011;469:236-240.
  35. Huang CY, Olieric V, Ma P, Howe N, Vogeley L, Liu X, Warshamanage R, Weinert T, Panepucci E, Kobilka B, Diederichs K, Wang M and Caffrey M. In meso in situ serial X-ray crystallography of soluble and membrane proteins at cryogenic temperatures. *Acta Crystallogr D Struct Biol*. 2016;72:93-112.
  36. Ma P, Weichert D, Aleksandrov LA, Jensen TJ, Riordan JR, Liu X, Kobilka BK and Caffrey M. The cubicon method for concentrating membrane proteins in the cubic mesophase. *Nat Protoc*. 2017;12:1745-1762.
  37. Chien EY, Liu W, Zhao Q, Katritch V, Han GW, Hanson MA, Shi L, Newman AH, Javitch JA, Cherezov V and Stevens RC. Structure of the human dopamine D3 receptor in complex with a D2/D3 selective antagonist. *Science*. 2010;330:1091-1095.
  38. Skelton NJ, Quan C, Reilly D and Lowman H. Structure of a CXC chemokine-receptor fragment in complex with interleukin-8. *Structure*. 1999;7:157-168.
  39. Spellmon N, Holcomb J, Niu A, Choudhary V, Sun X, Zhang Y, Wan J, Doughan M, Hayden S, Hachem F, Brunzelle J, Li C and Yang Z. Structural basis of PDZ-mediated chemokine receptor CXCR2 scaffolding by guanine nucleotide exchange factor PDZ-RhoGEF. *Biochem Biophys Res Commun*. 2017;485:529-534.
  40. Wu B, Chien EY, Mol CD, Fenalti G, Liu W, Katritch V, Abagyan R, Brooun A, Wells P, Bi FC, Hamel DJ, Kuhn P, Handel TM, Cherezov V and Stevens RC. Structures of the CXCR4 chemokine GPCR with small-molecule and cyclic peptide antagonists. *Science*. 2010;330:1066-1071.
  41. Horii K, Kahn ML and Herr AB. Structural basis for platelet collagen responses by the immune-type receptor glycoprotein VI. *Blood*. 2006;108:936-942.
  42. Nagae M, Morita-Matsumoto K, Kato M, Kaneko MK, Kato Y and Yamaguchi Y. A platform of C-type lectin-like



- receptor CLEC-2 for binding O-glycosylated podoplanin and nonglycosylated rhodocytin. *Structure*. 2014;22:1711-1121.
43. Watson AA, Brown J, Harlos K, Eble JA, Walter TS and O'Callaghan CA. The crystal structure and mutational binding analysis of the extracellular domain of the platelet-activating receptor CLEC-2. *J Biol Chem*. 2007;282:3165-3172.
  44. Yamniuk AP, Suri A, Krystek SR, Tamura J, Ramamurthy V, Kuhn R, Carroll K, Fleener C, Ryseck R, Cheng L, An Y, Drew P, Grant S, Suchard SJ, Nadler SG, Bryson JW and Sheriff S. Functional Antagonism of Human CD40 Achieved by Targeting a Unique Species-Specific Epitope. *J Mol Biol*. 2016;428:2860-2879.
  45. An HJ, Kim YJ, Song DH, Park BS, Kim HM, Lee JD, Paik SG, Lee JO and Lee H. Crystallographic and mutational analysis of the CD40-CD154 complex and its implications for receptor activation. *J Biol Chem*. 2011;286:11226-11235.
  46. Freedman SJ, Sanford DG, Bachovchin WW, Furie BC, Baleja JD and Furie B. Structure and function of the epidermal growth factor domain of P-selectin. *Biochemistry*. 1996;35:13733-13744.
  47. Somers WS, Tang J, Shaw GD and Camphausen RT. Insights into the molecular basis of leukocyte tethering and rolling revealed by structures of P- and E-selectin bound to SLe(X) and PSGL-1. *Cell*. 2000;103:467-479.
  48. Casanovas JM, Springer TA, Liu JH, Harrison SC and Wang JH. Crystal structure of ICAM-2 reveals a distinctive integrin recognition surface. *Nature*. 1997;387:312-315.
  49. Robertson N, Rappas M, Dore AS, Brown J, Bottegoni G, Koglin M, Cansfield J, Jazayeri A, Cooke RM and Marshall FH. Structure of the complement C5a receptor bound to the extra-helical antagonist NDT9513727. *Nature*. 2018;553:111-114.
  50. Wu Y, Gao F, Liu J, Qi J, Gostick E, Price DA and Gao GF. Structural basis of diverse peptide accommodation by the rhesus macaque MHC class I molecule Mamu-B\*17: insights into immune protection from simian immunodeficiency virus. *J Immunol*. 2011;187:6382-6392.
  51. Dimasi N, Moretta A, Moretta L, Biassoni R and Mariuzza RA. Structure of the saccharide-binding domain of the human natural killer cell inhibitory receptor p75/AIRM1. *Acta Crystallogr D Biol Crystallogr*. 2004;60:401-403.
  52. Alphey MS, Attrill H, Crocker PR and van Aalten DM. High resolution crystal structures of Siglec-7. Insights into ligand specificity in the Siglec family. *J Biol Chem*. 2003;278:3372-3377.
  53. Attrill H, Takazawa H, Witt S, Kelm S, Isecke R, Brossmer R, Ando T, Ishida H, Kiso M, Crocker PR and van Aalten DM. The structure of siglec-7 in complex with sialosides: leads for rational structure-based inhibitor design. *Biochem J*. 2006;397:271-278.
  54. Attrill H, Imamura A, Sharma RS, Kiso M, Crocker PR and van Aalten DM. Siglec-7 undergoes a major conformational change when complexed with the alpha(2,8)-disialylganglioside GT1b. *J Biol Chem*. 2006;281:32774-83.
  55. Hsieh FL, Turner L, Bolla JR, Robinson CV, Lavstsen T and Higgins MK. The structural basis for CD36 binding by the malaria parasite. *Nat Commun*. 2016;7:12837.
  56. Maekawa S, Ohto U, Shibata T, Miyake K and Shimizu T. Crystal structure of NOD2 and its implications in human disease. *Nat Commun*. 2016;7:11813.

57. Chadwick AC, Jensen DR, Hanson PJ, Lange PT, Proudfoot SC, Peterson FC, Volkman BF and Sahoo D. NMR Structure of the C-Terminal Transmembrane Domain of the HDL Receptor, SR-BI, and a Functionally Relevant Leucine Zipper Motif. *Structure*. 2017;25:446-457.
58. Kocher O, Birrane G, Yesilaltay A, Shechter S, Pal R, Daniels K and Krieger M. Identification of the PDZ3 domain of the adaptor protein PDZK1 as a second, physiologically functional binding site for the C terminus of the high density lipoprotein receptor scavenger receptor class B type I. *J Biol Chem*. 2011;286:25171-25186.
59. Paddock C, Lytle BL, Peterson FC, Holyst T, Newman PJ, Volkman BF and Newman DK. Residues within a lipid-associated segment of the PECAM-1 cytoplasmic domain are susceptible to inducible, sequential phosphorylation. *Blood*. 2011;117:6012-6023.
60. Paddock C, Zhou D, Lertkiatmongkol P, Newman PJ and Zhu J. Structural basis for PECAM-1 homophilic binding. *Blood*. 2016;127:1052-1061.
61. Hu M, Zhang H, Liu Q and Hao Q. Structural Basis for Human PECAM-1-Mediated Trans-homophilic Cell Adhesion. *Sci Rep*. 2016;6:38655.
62. Parang K, Till JH, Ablooglu AJ, Kohanski RA, Hubbard SR and Cole PA. Mechanism-based design of a protein kinase inhibitor. *Nat Struct Biol*. 2001;8:37-41.
63. Till JH, Ablooglu AJ, Frankel M, Bishop SM, Kohanski RA and Hubbard SR. Crystallographic and solution studies of an activation loop mutant of the insulin receptor tyrosine kinase: insights into kinase mechanism. *J Biol Chem*. 2001;276:10049-10055.
64. Hubbard SR. Crystal structure of the activated insulin receptor tyrosine kinase in complex with peptide substrate and ATP analog. *EMBO J*. 1997;16:5572-5581.
65. Hubbard SR, Wei L, Ellis L and Hendrickson WA. Crystal structure of the tyrosine kinase domain of the human insulin receptor. *Nature*. 1994;372:746-754.
66. Li S, Covino ND, Stein EG, Till JH and Hubbard SR. Structural and biochemical evidence for an autoinhibitory role for tyrosine 984 in the juxtamembrane region of the insulin receptor. *J Biol Chem*. 2003;278:26007-26014.
67. Hu J, Liu J, Ghirlando R, Saltiel AR and Hubbard SR. Structural basis for recruitment of the adaptor protein APS to the activated insulin receptor. *Mol Cell*. 2003;12:1379-1389.
68. Depetris RS, Hu J, Gimpelevich I, Holt LJ, Daly RJ and Hubbard SR. Structural basis for inhibition of the insulin receptor by the adaptor protein Grb14. *Mol Cell*. 2005;20:325-333.
69. Li S, Depetris RS, Barford D, Chernoff J and Hubbard SR. Crystal structure of a complex between protein tyrosine phosphatase 1B and the insulin receptor tyrosine kinase. *Structure*. 2005;13:1643-1651.
70. Lou M, Garrett TP, McKern NM, Hoyne PA, Epa VC, Bentley JD, Lovrecz GO, Cosgrove LJ, Frenkel MJ and Ward CW. The first three domains of the insulin receptor differ structurally from the insulin-like growth factor 1 receptor in the regions governing ligand specificity. *Proc. Natl. Acad. Sci. U.S.A.* 2006;103:12429-12434.

71. Li Q, Wong YL and Kang C. Solution structure of the transmembrane domain of the insulin receptor in detergent micelles. *Biochim Biophys Acta*. 2014;1838:1313-1321.
72. Katayama N, Orita M, Yamaguchi T, Hisamichi H, Kuromitsu S, Kurihara H, Sakashita H, Matsumoto Y, Fujita S and Niimi T. Identification of a key element for hydrogen-bonding patterns between protein kinases and their inhibitors. *Proteins*. 2008;73:795-801.
73. Wu J, Tseng YD, Xu CF, Neubert TA, White MF and Hubbard SR. Structural and biochemical characterization of the KRLB region in insulin receptor substrate-2. *Nat Struct Mol Biol*. 2008;15:251-258.
74. Chamberlain SD, Wilson JW, Deanda F, Patnaik S, Redman AM, Yang B, Shewchuk L, Sabbatini P, Leesnitzer MA, Groy A, Atkins C, Gerding R, Hassell AM, Lei H, Mook RA, Jr., Moorthy G, Rowand JL, Stevens KL, Kumar R and Shotwell JB. Discovery of 4,6-bis-anilino-1H-pyrrolo[2,3-d]pyrimidines: potent inhibitors of the IGF-1R receptor tyrosine kinase. *Bioorg Med Chem Lett*. 2009;19:469-473.
75. Patnaik S, Stevens KL, Gerding R, Deanda F, Shotwell JB, Tang J, Hamajima T, Nakamura H, Leesnitzer MA, Hassell AM, Shewchuck LM, Kumar R, Lei H and Chamberlain SD. Discovery of 3,5-disubstituted-1H-pyrrolo[2,3-b]pyridines as potent inhibitors of the insulin-like growth factor-1 receptor (IGF-1R) tyrosine kinase. *Bioorg Med Chem Lett*. 2009;19:3136-3140.
76. Menting JG, Whittaker J, Margetts MB, Whittaker LJ, Kong GK, Smith BJ, Watson CJ, Zakova L, Kletvikova E, Jiracek J, Chan SJ, Steiner DF, Dodson GG, Brzozowski AM, Weiss MA, Ward CW and Lawrence MC. How insulin engages its primary binding site on the insulin receptor. *Nature*. 2013;493:241-245.
77. Cabail MZ, Li S, Lemmon E, Bowen ME, Hubbard SR and Miller WT. The insulin and IGF1 receptor kinase domains are functional dimers in the activated state. *Nat Commun*. 2015;6:6406.
78. Menting JG, Lawrence CF, Kong GK, Margetts MB, Ward CW and Lawrence MC. Structural Congruency of Ligand Binding to the Insulin and Insulin/Type 1 Insulin-like Growth Factor Hybrid Receptors. *Structure*. 2015;23:1271-1282.
79. Croll TI, Smith BJ, Margetts MB, Whittaker J, Weiss MA, Ward CW and Lawrence MC. Higher-Resolution Structure of the Human Insulin Receptor Ectodomain: Multi-Modal Inclusion of the Insert Domain. *Structure*. 2016;24:469-476.
80. Sanderson MP, Apgar J, Garin-Chesa P, Hofmann MH, Kessler D, Quant J, Savchenko A, Schaaf O, Treu M, Tye H, Zahn SK, Zoephel A, Haaksma E, Adolf GR and Kraut N. BI 885578, a Novel IGF1R/INSR Tyrosine Kinase Inhibitor with Pharmacokinetic Properties That Dissociate Antitumor Efficacy and Perturbation of Glucose Homeostasis. *Mol Cancer Ther*. 2015;14:2762-2772.
81. Stauffer F, Cowan-Jacob SW, Scheufler C and Furet P. Identification of a 5-[3-phenyl-(2-cyclic-ether)-methylether]-4-aminopyrrolo[2,3-d]pyrimidine series of IGF-1R inhibitors. *Bioorg Med Chem Lett*. 2016;26:2065-2067.
82. Lawrence CF, Margetts MB, Menting JG, Smith NA, Smith BJ, Ward CW and Lawrence MC. Insulin Mimetic Peptide Disrupts the Primary Binding Site of the Insulin Receptor. *J Biol Chem*. 2016;291:15473-15481.
83. Cai W, Sakaguchi M, Kleinridders A, Gonzalez-Del Pino G, Dreyfuss JM, O'Neill BT, Ramirez AK, Pan H, Winnay JN,

Boucher J, Eck MJ and Kahn CR. Domain-dependent effects of insulin and IGF-1 receptors on signalling and gene expression. *Nat Commun.* 2017;8:14892.

84. Anastassiadis T, Duong-Ly KC, Deacon SW, Lafontant A, Ma H, Devarajan K, Dunbrack RL, Jr., Wu J and Peterson JR. A highly selective dual insulin receptor (IR)/insulin-like growth factor 1 receptor (IGF-1R) inhibitor derived from an extracellular signal-regulated kinase (ERK) inhibitor. *J Biol Chem.* 2013;288:28068-28077.

85. Menting JG, Yang Y, Chan SJ, Phillips NB, Smith BJ, Whittaker J, Wickramasinghe NP, Whittaker LJ, Pandeyarajan V, Wan ZL, Yadav SP, Carroll JM, Strokes N, Roberts CT, Jr., Ismail-Beigi F, Milewski W, Steiner DF, Chauhan VS, Ward CW, Weiss MA and Lawrence MC. Protective hinge in insulin opens to enable its receptor engagement. *Proc. Natl. Acad. Sci. U.S.A.* 2014;111:E3395-3404.

86. Carpenter B, Hemsworth GR, Wu Z, Maamra M, Strasburger CJ, Ross RJ and Artymiuk PJ. Structure of the human obesity receptor leptin-binding domain reveals the mechanism of leptin antagonism by a monoclonal antibody. *Structure.* 2012;20:487-497.

87. Gattis JL, Washington AV, Chisholm MM, Quigley L, Szyk A, McVicar DW and Lubkowski J. The structure of the extracellular domain of triggering receptor expressed on myeloid cells like transcript-1 and evidence for a naturally occurring soluble fragment. *J Biol Chem.* 2006;281:13396-13403.

88. Leppanen VM, Saharinen P and Alitalo K. Structural basis of Tie2 activation and Tie2/Tie1 heterodimerization. *Proc. Natl. Acad. Sci. U.S.A.* 2017;114:4376-4381.

89. Yan Q, Malashkevich VN, Fedorov A, Fedorov E, Cao E, Lary JW, Cole JL, Nathenson SG and Almo SC. Structure of CD84 provides insight into SLAM family function. *Proc. Natl. Acad. Sci. U.S.A.* 2007;104:10583-10588.

90. Karthikeyan S, Leung T and Ladas JA. Structural determinants of the Na<sup>+</sup>/H<sup>+</sup> exchanger regulatory factor interaction with the beta 2 adrenergic and platelet-derived growth factor receptors. *J Biol Chem.* 2002;277:18973-18978.

91. Pauptit RA, Dennis CA, Derbyshire DJ, Breeze AL, Weston SA, Rowsell S and Murshudov GN. NMR trial models: experiences with the colicin immunity protein Im7 and the p85alpha C-terminal SH2-peptide complex. *Acta Crystallogr D Biol Crystallogr.* 2001;57:1397-1404.

92. Waksman G, Kominos D, Robertson SC, Pant N, Baltimore D, Birge RB, Cowburn D, Hanafusa H, Mayer BJ, Overduin M, Resh MD, Rios CB, Silverman L and Kuriyan J. Crystal structure of the phosphotyrosine recognition domain SH2 of v-src complexed with tyrosine-phosphorylated peptides. *Nature.* 1992;358:646-653.

93. Muhle-Goll C, Hoffmann S, Afonin S, Grage SL, Polyansky AA, Windisch D, Zeitler M, Burck J and Ulrich AS. Hydrophobic matching controls the tilt and stability of the dimeric platelet-derived growth factor receptor (PDGFR) beta transmembrane segment. *J Biol Chem.* 2012;287:26178-26186.

94. Pascal SM, Singer AU, Gish G, Yamazaki T, Shoelson SE, Pawson T, Kay LE and Forman-Kay JD. Nuclear magnetic resonance structure of an SH2 domain of phospholipase C-gamma 1 complexed with a high affinity binding peptide. *Cell.* 1994;77:461-472.

95. Shim AH, Liu H, Focia PJ, Chen X, Lin PC and He X. Structures of a platelet-derived growth factor/propeptide complex and a platelet-derived growth factor/receptor complex. *Proc. Natl. Acad. Sci. U.S.A.* 2010;107:11307-11312.

# Supplemental Figure S1

## A

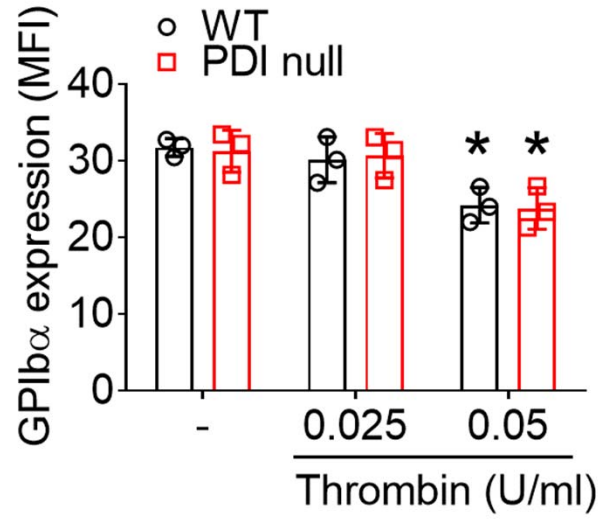

## B

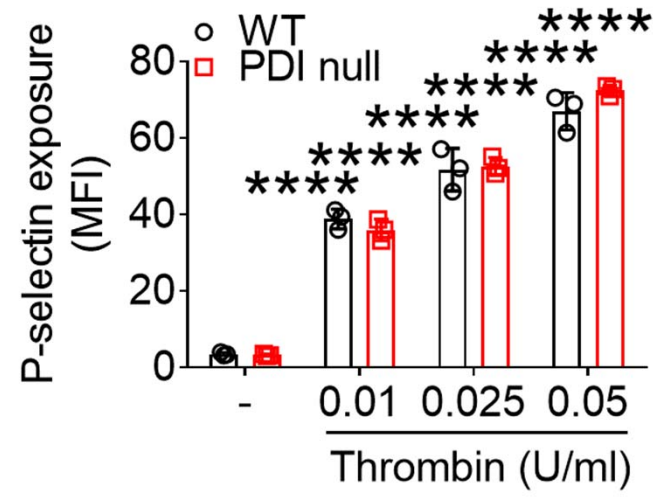

# Supplemental Figure S2

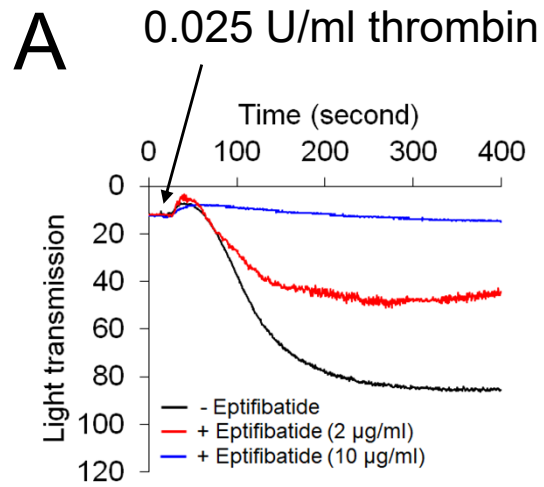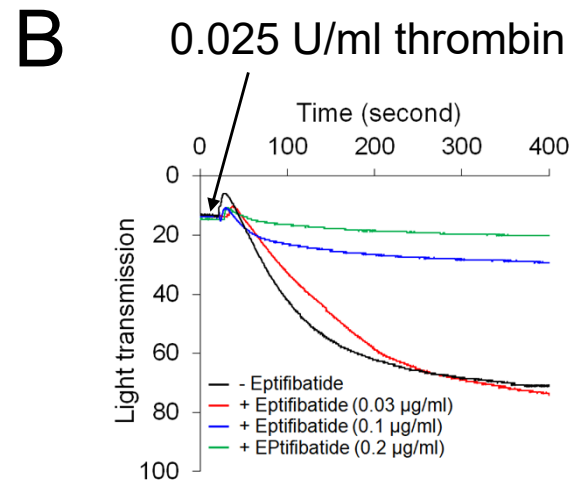

# Supplemental Figure S3

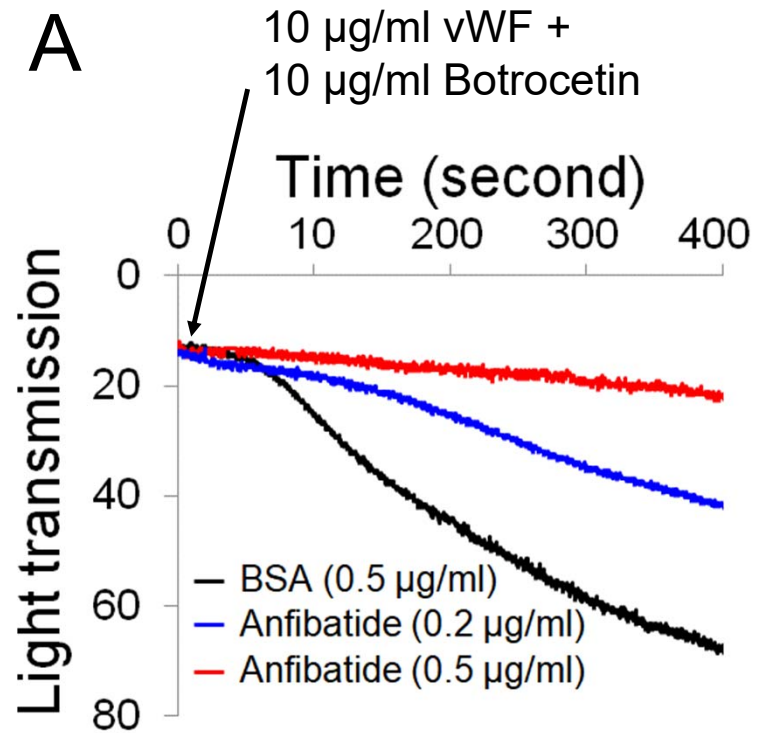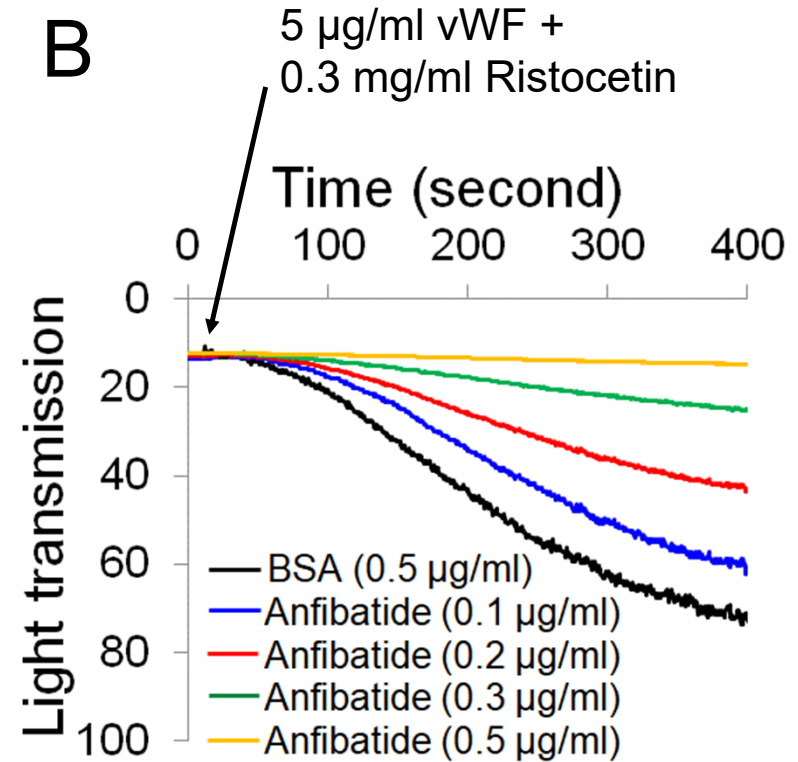



# Supplemental Figure S4

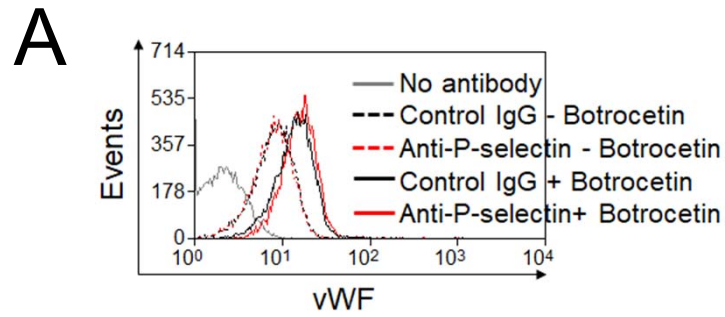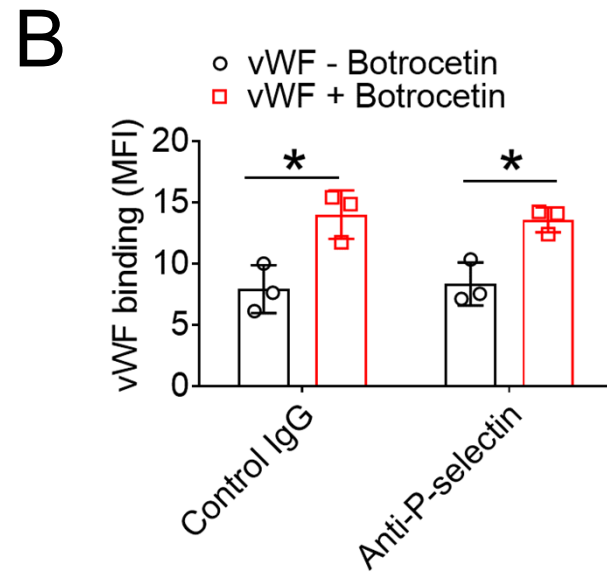

# Supplemental Figure S5

## A

- + thrombin + Alexa 488 control IgG
- - thrombin + Alexa 488 anti-PDI
- + thrombin + Alexa 488 anti-PDI

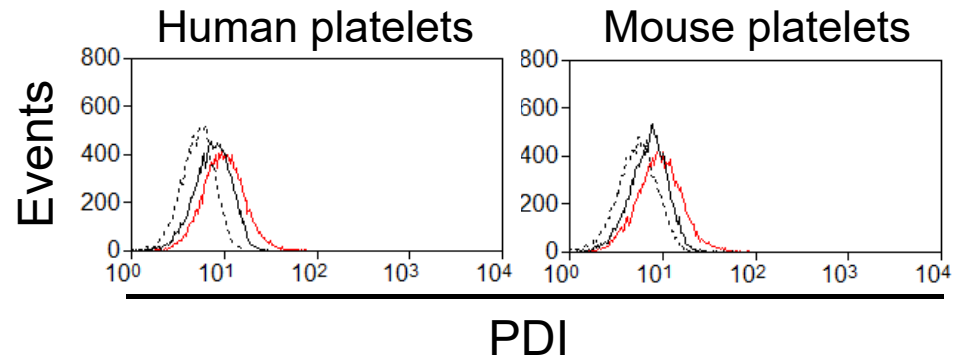

## B

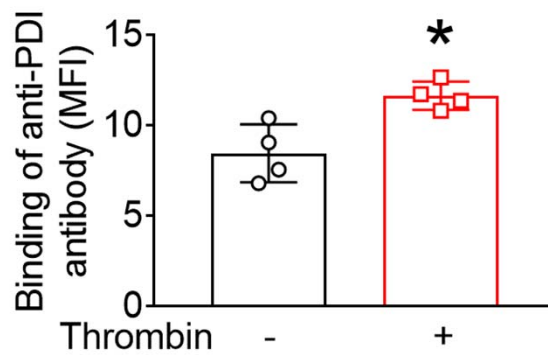

## C

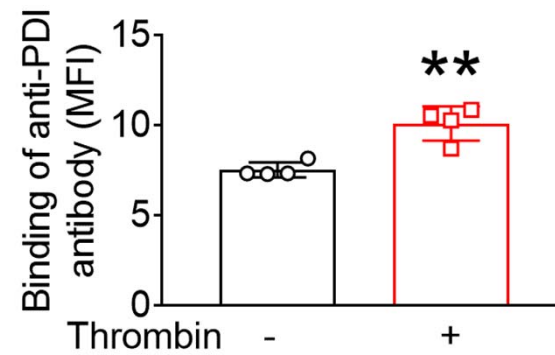

# Supplemental Figure S6

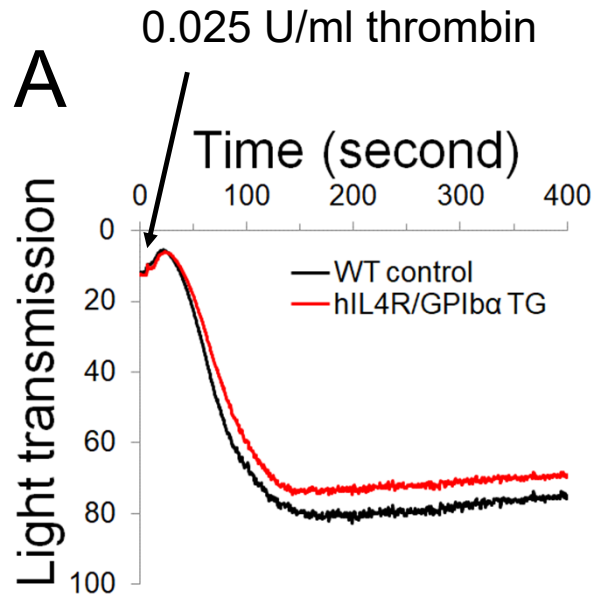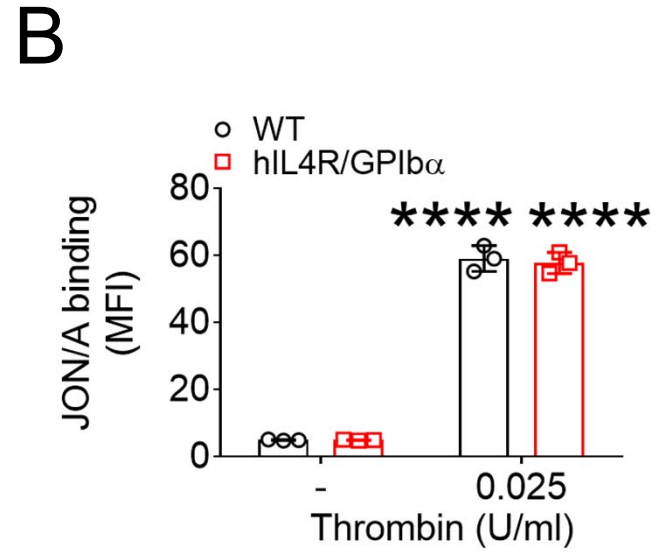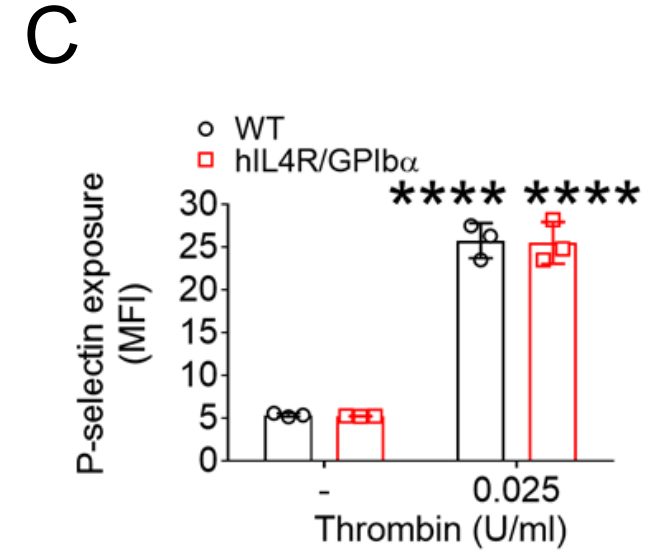

# Supplemental Figure S7

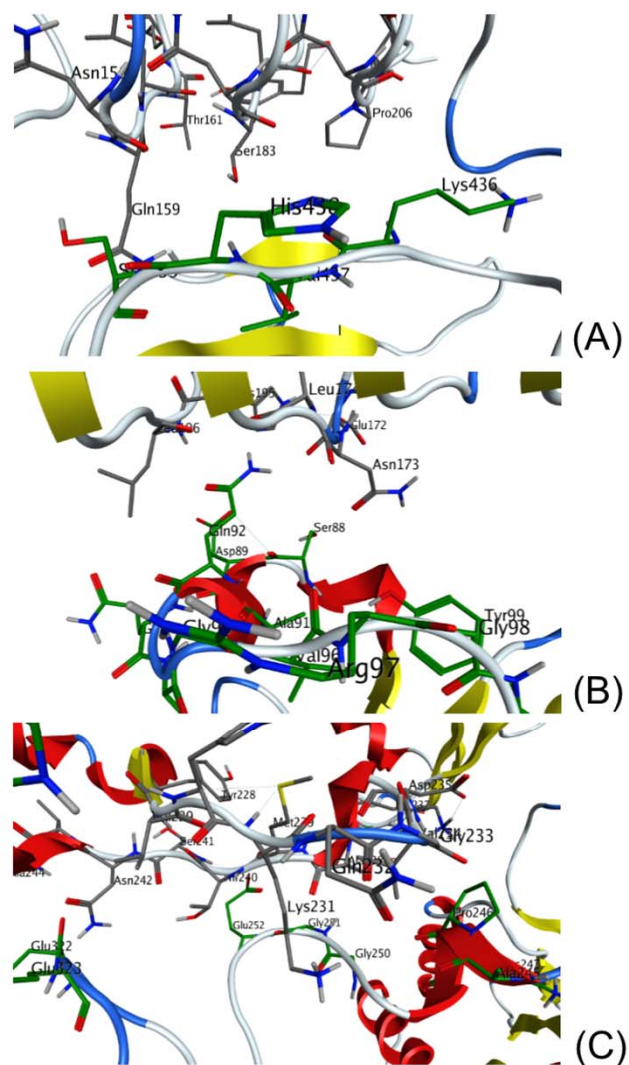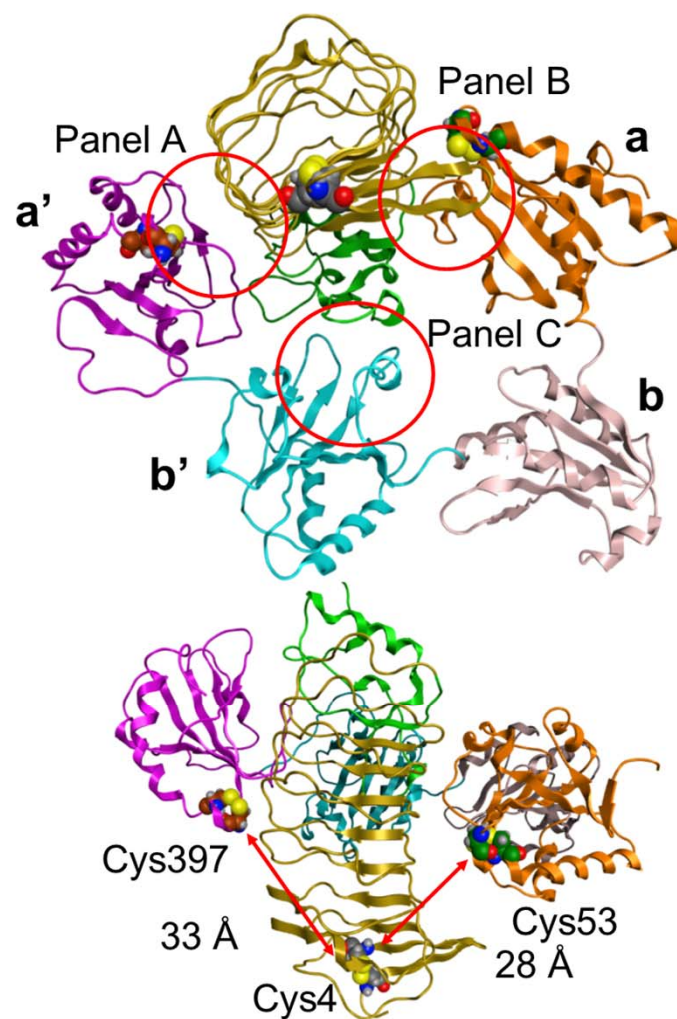

# Supplemental Figure S8

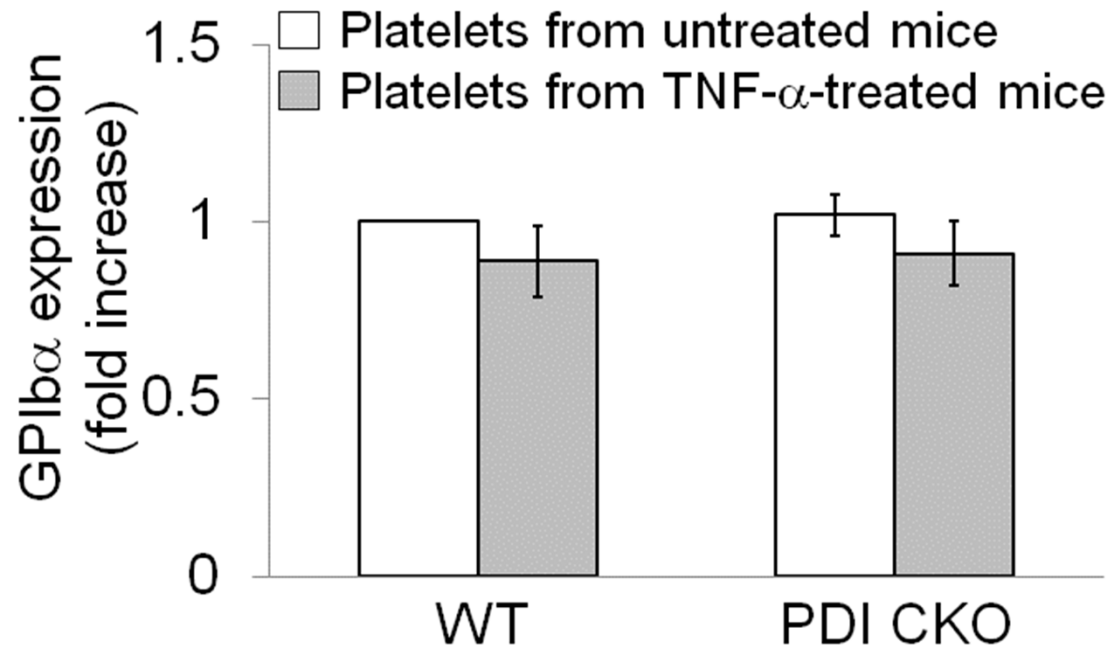

# Supplemental Figure S9

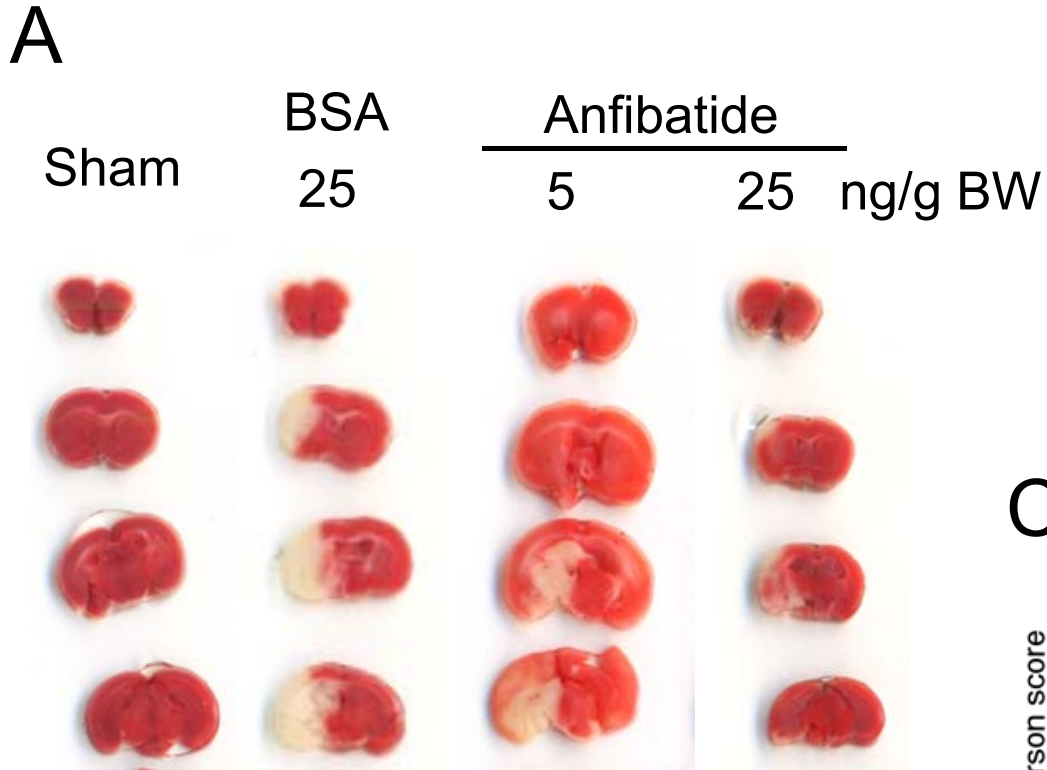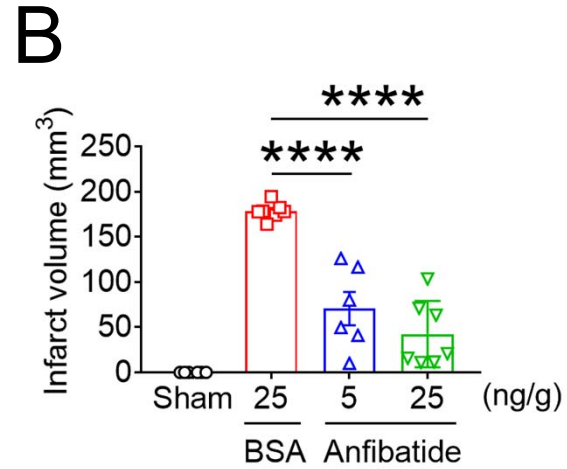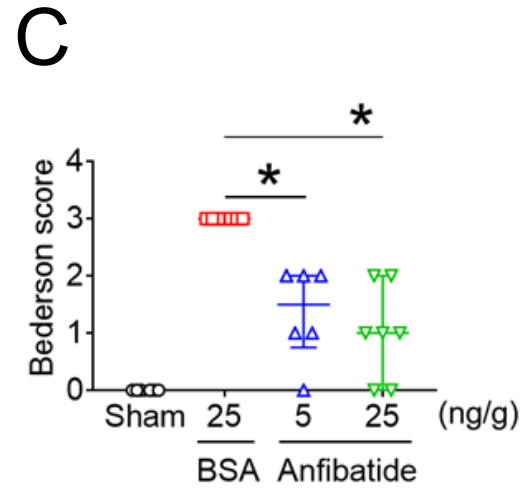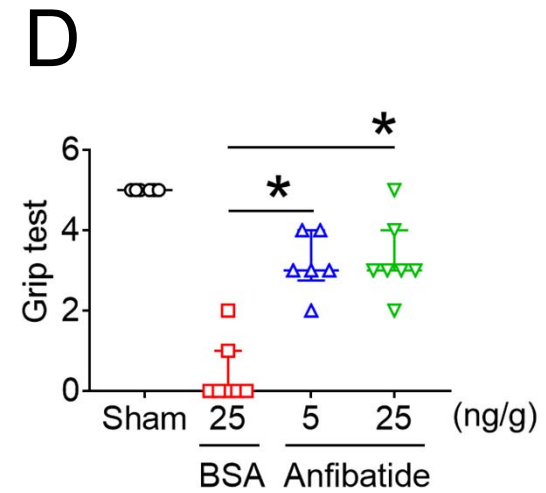

# Supplemental Figure S10 **A**

- ..... + thrombin + control IgG
- - thrombin + anti-PDI or anti-GPIIb $\alpha$
- + 0.025 U/ml thrombin + anti-PDI or anti-GPIIb $\alpha$
- + 0.05 U/ml thrombin + anti-PDI or anti-GPIIb $\alpha$

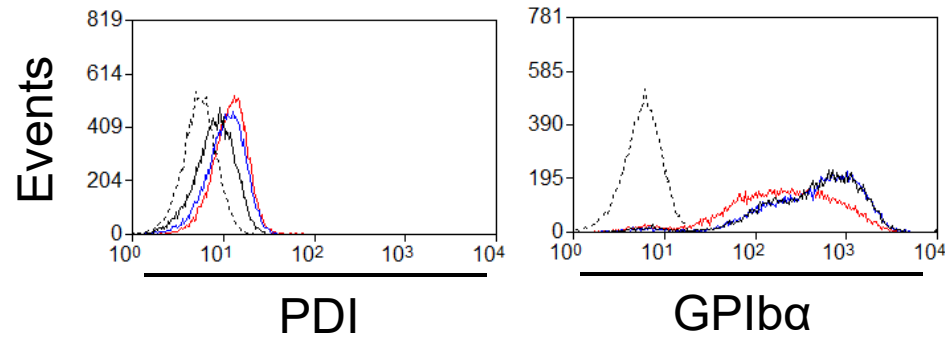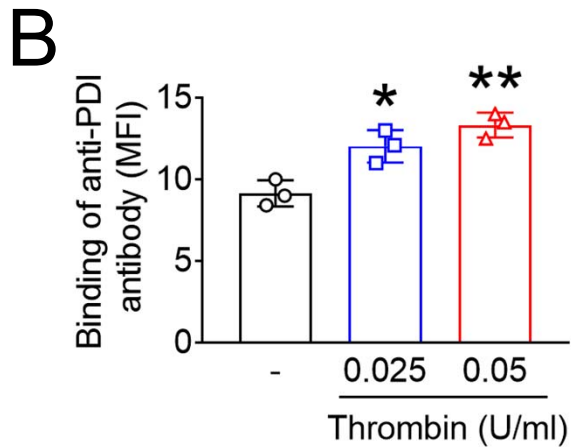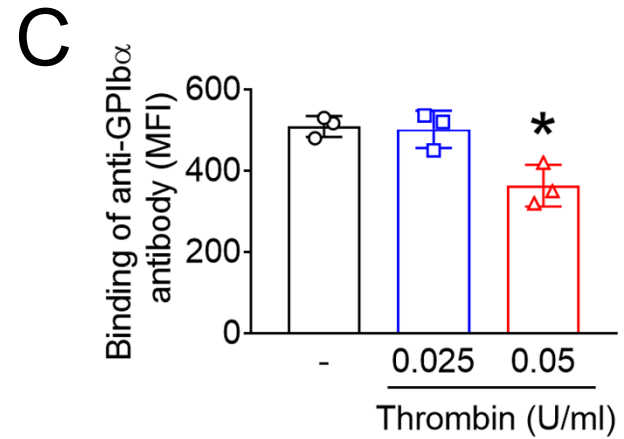

# Supplemental Figure S11

## A

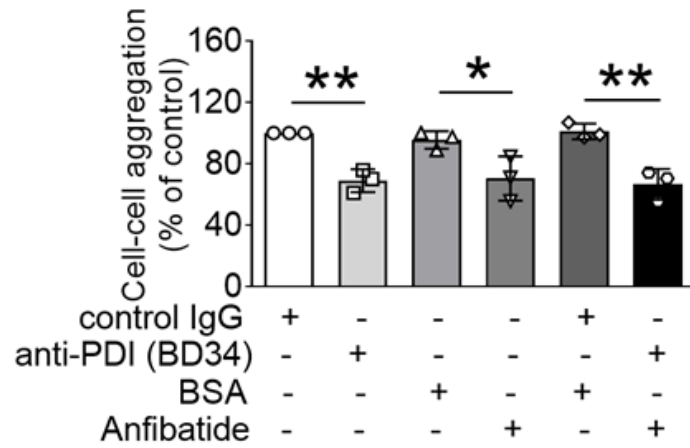

## B

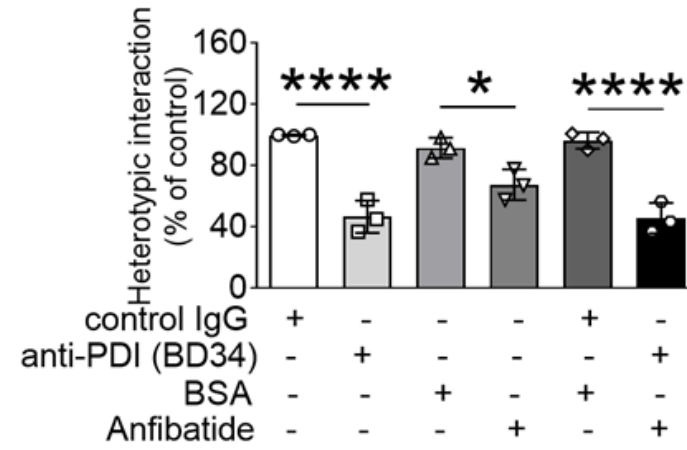



# Supplemental Figure S12

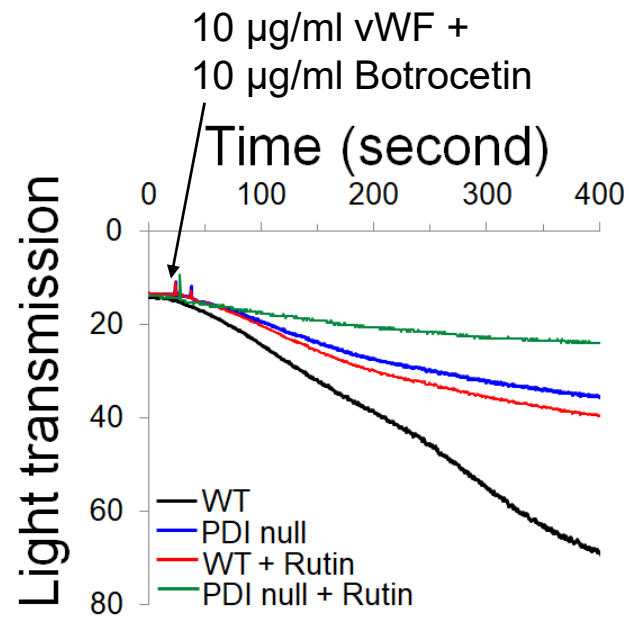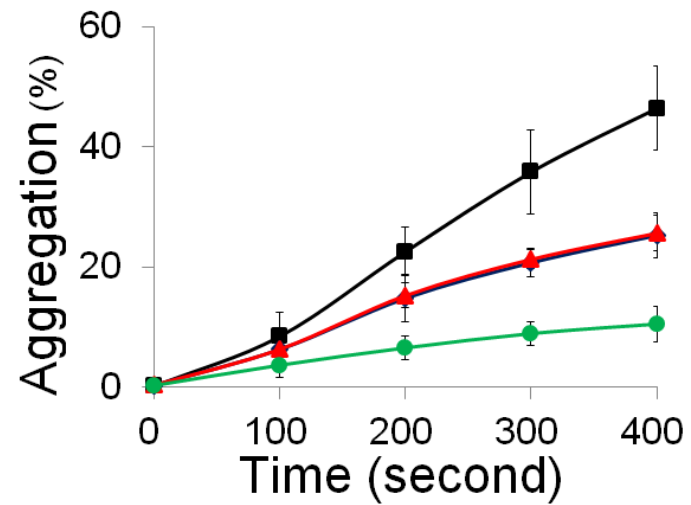

## SUPPLEMENTAL FIGURE LEGEND

**Figure S1. The surface levels of platelet GPIb $\alpha$  and P-selectin are not affected by PDI deletion.** Flow cytometry was performed to determine the surface amount of GPIb $\alpha$  (A) and P-selectin (B) on resting and thrombin-activated WT and PDI-null platelets. Data are shown as the MFI value and represent the mean  $\pm$  SD (n = 3). \**P* < 0.05 and \*\*\*\**P* < 0.0001 versus unstimulated platelets after ANOVA and Dunnett's test.

**Figure S2. Eptifibatide blocks  $\alpha$ IIb $\beta$ 3-mediated platelet aggregation induced by thrombin.** WT mouse (A) and human (B) platelets were pretreated with vehicle or different concentrations of eptifibatide, followed by stimulation with thrombin. The representative aggregation traces were obtained from three independent experiments.

**Figure S3. Anfibatide inhibits platelet agglutination in a concentration-dependent manner.** Mouse (A) and human (B) platelets were pretreated with BSA (0.5  $\mu$ g/ml) or Anfibatide (0.1-0.5  $\mu$ g/ml) and then incubated with vWF and either botrocetin or ristocetin. The representative agglutination traces were obtained from three independent experiments.

**Figure S4. Inhibition of P-selectin does not impair vWF binding to mouse platelets.** WT mouse platelets were pretreated with control IgG or a blocking anti-P-selectin antibody (10  $\mu$ g/ml). After washing, platelets were incubated with 10  $\mu$ g/ml vWF and 10 mM EDTA in the presence or absence of 10  $\mu$ g/ml botrocetin. Flow cytometry was performed using FITC-labeled anti-vWF antibodies. (A) Representative histogram. (B) Data are shown as the MFI value and represent the mean  $\pm$  SD (n = 3). \**P* < 0.05 after

ANOVA and Tukey's test.

**Figure S5. Surface-bound PDI is detected on unstimulated and stimulated platelets.**

WT control mouse (PDI<sup>fl<sup>ox</sup>/fl<sup>ox</sup></sup>, A-B) and human (A and C) platelets were treated with or without 0.025 U/ml thrombin. The surface level of PDI was measured by flow cytometry using rabbit IgG or polyclonal anti-PDI antibodies equivalently conjugated with Alexa Fluor 488. Data represent the mean  $\pm$  SD (n = 4). \* $P$  < 0.05 or \*\* $P$  < 0.01 versus unstimulated platelets after Student's  $t$ -test.

**Figure S6. Deletion of the GPIIb $\alpha$  extracellular domain does not affect aggregation,  $\alpha$ IIb $\beta$ 3 activation, and P-selectin exposure in platelets.**

(A) Aggregation of WT and hIL4R/GPIIb $\alpha$  platelets was initiated with 0.025 U/ml thrombin. The representative aggregation trace was obtained from three independent experiments. (B-C) WT and hIL4R/GPIIb $\alpha$  platelets were treated with or without 0.025 U/ml thrombin, followed by flow cytometry using antibodies against activated  $\alpha$ IIb $\beta$ 3 (JON/A) or P-selectin. Data represent the mean  $\pm$  SD (n = 3). \*\*\*\* $P$  < 0.0001 versus unstimulated platelets after Student's  $t$ -test.

**Figure S7. A docking model of PDI-GPIIb $\alpha$  complex.**

A set of representative residues at the interface between GPIIb $\alpha$  and oxidized PDI. Panel A: the a'-domain of PDI and the  $\beta$ -finger of GPIIb $\alpha$ , Panel B: the a-domain of PDI and the  $\beta$ -finger of GPIIb $\alpha$ , and Panel C: the b'-domain of PDI and the  $\beta$ -switch of GPIIb $\alpha$ .

**Figure S8. GPIIb $\alpha$  is not shed in circulating platelets during TNF- $\alpha$ -induced vascular**

**inflammation.** Saline or TNF- $\alpha$  was intrascrotally injected into WT and platelet-specific PDI CKO mice. Platelets were isolated at 3 hours after TNF- $\alpha$  injection. The surface level of GPIb $\alpha$  was measured by flow cytometry. Data represent the mean  $\pm$  SD (n = 3 mice per group).

**Figure S9. Anfibatide dose-dependently reduces the infarct volume and ameliorates neurological deficits in I/R-induced stroke.** WT (C57BL/6) mice were subjected to transient MCAO and reperfusion as described in Methods. BSA or Anfibatide (5 or 25 ng/g BW) was intravenously infused into mice right after 1-hour MCAO, followed by 23-hour reperfusion. (A) Staining of brain sections with 2,3,5-triphenyltetrazolium chloride. (B) The infarct volume was measured. (C-D) The Bederson score and grip test were used to analyze neurologic outcome in the surviving animals 24 hours after MCAO. Data represent the mean  $\pm$  SD except for the Bederson score and the grip test score, which are shown as scatter plots including median with interquartile range (n = 6-7 mice per group). \*:P<0.05 or \*\*\*\*:P<0.0001 after ANOVA and Tukey's test (B) or Kruskal-Wallis test with post hoc Dunn correction (C-D).

**Figure S10. GPIb $\alpha$  and PDI are detected on unstimulated and stimulated platelets isolated from SCD mice.** Platelets isolated from SCD mice were treated with or without 0.025-0.05 U/ml thrombin. The surface levels of GPIb $\alpha$  and PDI were measured by flow cytometry using Alexa Fluor 488-conjugated rabbit IgG or polyclonal anti-PDI antibodies, or FITC-conjugated rat IgG2a or anti-GPIb $\alpha$  antibodies (Xia.B2). (A) Representative histogram. (B-C) Data are shown as the MFI value and represent the mean  $\pm$  SD (n = 3).

\* $P < 0.05$  or \*\* $P < 0.01$  versus unstimulated platelets after ANOVA and Dunnett's test.

**Figure S11. Platelet PDI-regulated GPIIb $\alpha$  function is important for heterotypic aggregation of platelets and neutrophils isolated from SCD mice.** Platelets and neutrophils were isolated from SCD mice and labeled with DyLight 488-conjugated CD42c and Alexa Fluor 647-conjugated anti-Ly-6G antibodies, respectively. Platelets were treated with 0.025 U/ml thrombin in the presence of control IgG, an anti-PDI antibody, BSA, Anfibatide, or both inhibitors, followed by mixing with activated neutrophils under a stirring condition. Flow cytometry was performed as shown in Figure 4A-C. Cell-cell aggregation was measured by (A) the number of cell-cell aggregates and (B) the fluorescence intensities of anti-CD42c antibodies (Heterotypic interaction). \*: $P < 0.05$ , \*\*: $P < 0.01$ , or \*\*\*\*: $P < 0.0001$  after ANOVA and Tukey's test.

**Figure S12. Rutin inhibits agglutination of PDI-null platelets.** WT and PDI-null platelets were pre-incubated with vehicle (0.1% DMSO) or 50  $\mu$ M rutin and then treated with vWF and botrocetin. The representative agglutination/aggregation traces were obtained from three independent experiments. Data represent the mean  $\pm$  SD.

Video 1. Platelet-neutrophil interactions during TNF- $\alpha$ -induced vascular inflammation in WT mice.

Video 2. Platelet-neutrophil interactions during TNF- $\alpha$ -induced vascular inflammation in platelet-specific PDI CKO mice.

Video 3. Platelet-neutrophil interactions during TNF- $\alpha$ -induced vascular inflammation in platelet-specific PDI CKO mice treated with wtPDI.

Video 4. Platelet-neutrophil interactions during TNF- $\alpha$ -induced vascular inflammation in platelet-specific PDI CKO mice treated with dmPDI.
